# Supplementary material for: Solvent-free one-pot oxidation of ethylarenes for the preparation of α-ketoamides under mild conditions
Source: Royal Society of Chemistry journal article supplement (doi:10.1039/c6ra26679g), 2017-01-01
Supplement: c6ra26679g1.pdf [file c6ra26679g1.pdf]

## Supplementary Information

# Solvent-free one-pot oxidation of ethylarenes to the preparation of $\alpha$ -ketoamides under mild conditions

### Contents

|                                                                                                               |           |
|---------------------------------------------------------------------------------------------------------------|-----------|
| <b>1. Experimentals</b> .....                                                                                 | <b>2</b>  |
| <b>2. General procedures for the synthesis of <math>\alpha</math>-ketoamides</b> .....                        | <b>2</b>  |
| <b>3. Characterization data for all products</b> .....                                                        | <b>3</b>  |
| 1-morpholino-2-phenylethane-1,2-dione .....                                                                   | 3         |
| 1-morpholino-2-(4-nitrophenyl)ethane-1,2-dione .....                                                          | 3         |
| 1-(4-Bromophenyl)-2-morpholinoethane-1,2-dione .....                                                          | 3         |
| 1-(3-Bromophenyl)-2-morpholinoethane-1,2-dione .....                                                          | 3         |
| 1-(2-bromophenyl)-2-morpholinoethane-1,2-dione.....                                                           | 4         |
| 1-(4-ethylphenyl)-2-morpholinoethane-1,2-dione .....                                                          | 4         |
| 1-Morpholino-2-(o-tolyl)ethane-1,2-dione .....                                                                | 4         |
| 1-Phenyl-2-(pyrrolidin-1-yl)ethane-1,2-dione .....                                                            | 4         |
| 1-(4-nitrophenyl)-2-(pyrrolidin-1-yl)ethane-1,2-dione .....                                                   | 5         |
| 1-(4-bromophenyl)-2-(pyrrolidin-1-yl)ethane-1,2-dione .....                                                   | 5         |
| 1-(pyrrolidin-1-yl)-2-(p-tolyl)ethane-1,2-dione.....                                                          | 5         |
| 1-Phenyl-2-(piperidin-1-yl)ethane-1,2-dione.....                                                              | 5         |
| 1-(4-Nitrophenyl)-2-(piperidin-1-yl)ethane-1,2-dione .....                                                    | 6         |
| 1-(4-Bromophenyl)-2-(piperidin-1-yl)ethane-1,2-dione.....                                                     | 6         |
| 1-(3-Bromophenyl)-2-(piperidin-1-yl)ethane-1,2-dione.....                                                     | 6         |
| 1-(Piperidin-1-yl)-2-(o-tolyl)ethane-1,2-dione.....                                                           | 7         |
| 1-(piperidin-1-yl)-2-(m-tolyl)ethane-1,2-dione .....                                                          | 7         |
| 1-(Piperidin-1-yl)-2-(p-tolyl)ethane-1,2-dione.....                                                           | 7         |
| 1-(4-Methylpiperidin-1-yl)-2-phenylethane-1,2-dione .....                                                     | 7         |
| tert-butyl 4-(2-oxo-2-phenylacetyl)piperazine-1-carboxylate .....                                             | 8         |
| N,N-diethyl-2-oxo-2-phenylacetamide .....                                                                     | 8         |
| <b>4. <math>^1\text{H}</math> NMR and <math>^{13}\text{C}</math> NMR spectrum for isolated products</b> ..... | <b>8</b>  |
| <b>5. References</b> .....                                                                                    | <b>30</b> |

## 1. Experimentals

All chemicals were commercially available and purchased from Aladdin (Shanghai, China) and were used as received without any further purification. All chemicals used were of analytical grade.  $^1\text{H}$  NMR and  $^{13}\text{C}$  NMR spectrum were recorded on a Bruker Avance 400 MHz.  $^1\text{H}$  NMR (400 MHz) and  $^{13}\text{C}$  NMR (100 MHz) spectra were recorded on a Bruker Avance 400 spectrometers in  $\text{CDCl}_3$ . All chemical shifts ( $\delta$ ) were quoted in parts per million (ppm) and reported relative to an internal tetramethylsilane (TMS,  $\delta$  0.00) standard. The following abbreviations were used to explain the multiplicities: s = singlet, d = doublet, t = triplet, q = quartet, m = multiplet. Yields of products were measured by HPLC analysis using SHIMADZU instrument equipped with a column Wonda Sil C18-WR  $5\mu\text{m}$ .

## 2. General procedures for the synthesis of $\alpha$ -ketoamides

Ethylarene **1** (1.0 mmol), CuI (20 mol%) and TBHP (3 equiv) were added in a 25 mL sealed tube with a Teflon lined cap. The mixture was stirred in an oil bath at  $50^\circ\text{C}$  for 4 h. Then morpholine **2** (6 mmol) was added in batches. After 24 h, the reaction mixture was cooled to room temperature, and diluted with water, then extracted with ethyl acetate ( $20\text{ mL} \times 3$ ). Organic layer was washed with brine solution and dried over anhydrous  $\text{MgSO}_4$ . After the solvent was removed, the residue was purified with chromatography column on silica gel using hexane/ethyl acetate as eluent to give the corresponding product.

### 3.Characterization data for all products

#### *1-morpholino-2-phenylethane-1,2-dione*

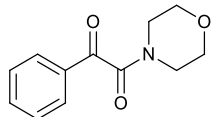

**3aa:**<sup>[1]</sup> Yellow oil

<sup>1</sup>H NMR (400 MHz, CDCl<sub>3</sub>): δ 7.92 (*d*, *J* = 7.2 Hz, 2H), 7.62 (*t*, *J* = 7.6, 1H), 7.49 (*t*, *J* = 8 Hz, 1H), 3.75 (*Br, s*, 4H), 3.61 (*t*, *J* = 5.2 Hz, 2H), 3.34 (*t*, *J* = 5.2 Hz, 2H); <sup>13</sup>C NMR (100 MHz, CDCl<sub>3</sub>): δ 191.19, 165.46, 134.95, 133.03, 129.62, 129.11, 66.67, 66.59, 46.23, 41.59.

#### *1-morpholino-2-(4-nitrophenyl)ethane-1,2-dione*

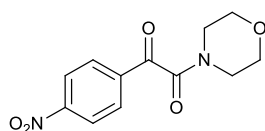

**3ba:**<sup>[2]</sup> Yellow solid

<sup>1</sup>H NMR (400 MHz, CDCl<sub>3</sub>): δ 8.37 (*d*, *J* = 8.8 Hz, 2H), 8.185-8.163 (*m*, 2H), 3.83 (*Br, s*, 4H), 3.72-3.70 (*m*, 2H), 3.44 (*t*, *J* = 4.8 Hz, 2H); <sup>13</sup>C NMR (100 MHz, CDCl<sub>3</sub>): δ 188.70, 164.04, 151.19, 137.49, 130.83, 124.16, 66.73, 66.61, 46.35, 41.95.

#### *1-(4-Bromophenyl)-2-morpholinoethane-1,2-dione*

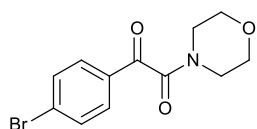

**3ca:**<sup>[1]</sup> Yellow solid

<sup>1</sup>H NMR (400 MHz, CDCl<sub>3</sub>): δ 7.83 (*d*, *J* = 8.8 Hz, 2H), 7.66 (*d*, *J* = 8.4 Hz, 2H), 3.78 (*Br, s*, 4H), 3.65 (*t*, *J* = 5.2 Hz, 2H), 3.38 (*t*, *J* = 4.8 Hz, 2H).  
<sup>13</sup>C NMR (100 MHz, CDCl<sub>3</sub>): δ 189.91, 164.86, 132.50, 131.90, 131.06, 130.45, 66.72, 66.62, 46.28, 47.72.

#### *1-(3-Bromophenyl)-2-morpholinoethane-1,2-dione*

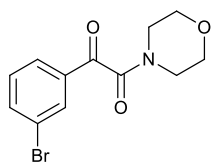

**3da:** <sup>[3]</sup> Yellow oil

<sup>1</sup>H NMR (400 MHz, CDCl<sub>3</sub>): δ 8.08 (*s*, 1H), 7.86 (*d*, *J* = 8 Hz, 1H), 7.76 (*d*, *J* = 7.6 Hz, 1H), 7.39 (*t*, *J* = 8 Hz, 1H), 3.77 (*Br, s*, 4H), 3.64 (*t*, *J* = 4.4 Hz, 2H), 3.36 (*t*, *J* = 4.8 Hz, 2H); <sup>13</sup>C NMR (100 MHz, CDCl<sub>3</sub>): δ 189.50, 164.60, 137.72, 134.83, 132.31, 130.69, 128.35, 123.33, 66.69, 66.60, 46.27, 41.74.

***1-(2-bromophenyl)-2-morpholinoethane-1,2-dione***

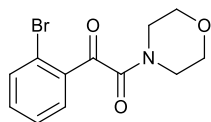

**3ea:** <sup>[2]</sup> Yellow solid

<sup>1</sup>H NMR (400 MHz, CDCl<sub>3</sub>): δ 7.84 (*d*, *J* = 7.2 Hz, 1H), 7.67 (*d*, *J* = 7.2 Hz, 1H), 7.51-7.43 (*m*, 2H), 3.84-3.80 (*m*, 4H), 3.76 (*d*, *J* = 4.0 Hz, 2H), 3.60 (*t*, *J* = 4.4 Hz, 2H); <sup>13</sup>C NMR (100 MHz, CDCl<sub>3</sub>): δ 190.44, 164.86, 135.50, 134.30, 134.06, 132.70, 127.89, 121.50, 66.32, 66.26, 46.32, 42.07.

***1-(4-ethylphenyl)-2-morpholinoethane-1,2-dione***

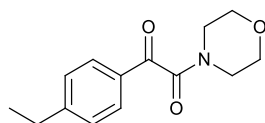

**3fa:** <sup>[2]</sup> Yellow oil

<sup>1</sup>H NMR (400 MHz, CDCl<sub>3</sub>): δ 7.88 (*d*, *J* = 8.0 Hz, 2H), 7.35 (*d*, *J* = 8.0 Hz, 2H), 3.79 (*Br, s*, 4H), 3.65 (*t*, *J* = 4.8 Hz, 2H), 3.38 (*t*, *J* = 4.4 Hz, 2H), 2.73 (*q*, *J* = 7.8 Hz, 2H), 1.26 (*t*, *J* = 7.6 Hz, 3H); <sup>13</sup>C NMR (100 MHz, CDCl<sub>3</sub>): δ 190.93, 165.69, 152.37, 130.84, 129.89, 128.66, 66.74, 66.65, 46.26, 41.57, 29.16, 15.06.

***1-Morpholino-2-(o-tolyl)ethane-1,2-dione***

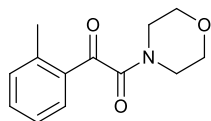

**3ga:** <sup>[3]</sup> Yellow oil

<sup>1</sup>H NMR (400 MHz, CDCl<sub>3</sub>): δ 7.60 (*d*, *J* = 8.0 Hz, 1H), 7.35 (*t*, *J* = 8.0 Hz, 1H), 7.21-7.15 (*m*, 2H), 3.61 (*Br, s*, 4H), 3.50 (*t*, *J* = 4.0 Hz, 2H), 3.24 (*d*, *J* = 4.4 Hz, 2H), 2.51 (*s*, 3H); <sup>13</sup>C NMR (100 MHz, CDCl<sub>3</sub>): δ 193.13, 166.04, 141.28, 133.81, 132.58, 131.43, 126.20, 66.47, 66.42, 46.12, 41.45, 21.66.

***1-Phenyl-2-(pyrrolidin-1-yl)ethane-1,2-dione***

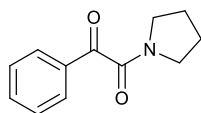

**3ab:** <sup>[4]</sup> Yellow oil

<sup>1</sup>H NMR (400 MHz, CDCl<sub>3</sub>): δ 8.00 (d, *J* = 7.6 Hz, 2H), 7.65 (t, *J* = 7.6 Hz, 1H), 7.52 (t, *J* = 7.6 Hz, 2H), 3.67 (t, *J* = 6.4 Hz, 2H), 3.43 (t, *J* = 6.0 Hz, 2H), 1.99-1.94 (m, 4H); <sup>13</sup>C NMR (100 MHz, CDCl<sub>3</sub>): δ 191.59, 164.96, 134.62, 132.93, 129.88, 128.94, 46.69, 45.26, 25.91, 24.02.

***1-(4-nitrophenyl)-2-(pyrrolidin-1-yl)ethane-1,2-dione***

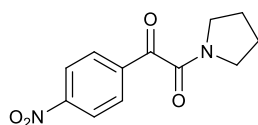

**3bb:** <sup>[5]</sup> Yellow solid

<sup>1</sup>H NMR (400 MHz, CDCl<sub>3</sub>): δ 8.35 (d, *J* = 8.8 Hz, 2H), 8.23 (d, *J* = 8.4 Hz, 2H), 3.68 (d, *J* = 6.4 Hz, 2H), 3.52 (s, 2H), 2.01 (Br, s, 4H); <sup>13</sup>C NMR (100 MHz, CDCl<sub>3</sub>): 189.04, 163.18, 150.99, 137.66, 131.11, 123.95, 46.95, 45.72, 26.00, 23.94.

***1-(4-bromophenyl)-2-(pyrrolidin-1-yl)ethane-1,2-dione***

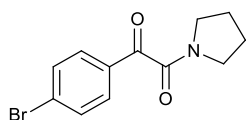

**3cb:** <sup>[5]</sup> Yellow oil

<sup>1</sup>H NMR (400 MHz, CDCl<sub>3</sub>): δ 7.85 (d, *J* = 8.4 Hz, 2H), 7.62 (d, *J* = 8.4 Hz, 2H), 3.62 (t, *J* = 6.4 Hz, 2H), 3.40 (t, *J* = 6.4 Hz, 2H), 1.93 (m, 4H); <sup>13</sup>C NMR (100 MHz, CDCl<sub>3</sub>): δ 190.29, 164.21, 132.28, 131.79, 131.33, 130.04, 46.75, 45.38, 25.92, 23.97.

***1-(pyrrolidin-1-yl)-2-(p-tolyl)ethane-1,2-dione***

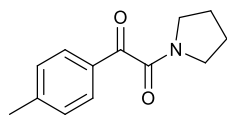

**3ib:** <sup>[8]</sup> Yellow solid

<sup>1</sup>H NMR (400 MHz, CDCl<sub>3</sub>): δ 7.82 (d, *J* = 7.6 Hz, 2H), 7.24 (d, *J* = 8 Hz, 2H), 3.58 (t, *J* = 6.4 Hz, 2H), 3.34 (t, *J* = 6.4 Hz, 2H), 2.36 (Br, s, 3H), 1.88 (s, 4H); <sup>13</sup>C NMR (100 MHz, CDCl<sub>3</sub>): δ 191.36, 165.19, 145.82, 130.43, 129.90, 129.65, 46.60, 45.12, 26.84, 23.97, 21.82.

***1-Phenyl-2-(piperidin-1-yl)ethane-1,2-dione***

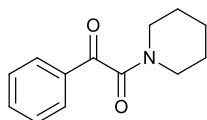

**3ac:** <sup>[3]</sup> Yellow oil

<sup>1</sup>H NMR (400 MHz, CDCl<sub>3</sub>): δ 7.95 (*d*, *J* = 8.4 Hz, 2H), 7.66-7.62 (*m*, 1H) 7.52 (*t*, *J* = 7.6 Hz, 2H), 3.71 (*Br, s*, 2H), 3.29 (*t*, *J* = 5.6 Hz, 2H), 1.70 (*t*, *J* = 2.8 Hz, 4H), 1.55 (*d*, *J* = 5.2 Hz, 2H); <sup>13</sup>C NMR (100 MHz, CDCl<sub>3</sub>): δ 191.97, 165.47, 134.66, 133.29, 129.55, 129.01, 47.03, 42.15, 26.19, 25.45, 24.36.

***1-(4-Nitrophenyl)-2-(piperidin-1-yl)ethane-1,2-dione***

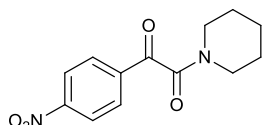

**3bc:** <sup>[1]</sup> Yellow solid

<sup>1</sup>H NMR (400 MHz, CDCl<sub>3</sub>): δ 8.37 (*d*, *J* = 8.4 Hz, 2H), 8.16 (*d*, *J* = 8.8 Hz, 2H), 3.75 (*Br, s*, 2H), 3.34 (*t*, *J* = 5.6 Hz, 2H), 1.75 (*d*, *J* = 2.8 Hz, 4H), 1.61 (*Br, s*, 2H); <sup>13</sup>C NMR (100 MHz, CDCl<sub>3</sub>): δ 189.52, 164.14, 151.11, 137.76, 130.66, 124.13, 47.13, 42.52, 26.33, 25.46, 24.32.

***1-(4-Bromophenyl)-2-(piperidin-1-yl)ethane-1,2-dione***

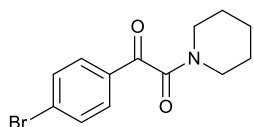

**3cc:** <sup>[3]</sup> Yellow oil

<sup>1</sup>H NMR (400 MHz, CDCl<sub>3</sub>): δ 7.80 (*d*, *J* = 8.4 Hz, 2H), 7.65 (*d*, *J* = 8.4 Hz, 2H), 3.70-3.68 (*m*, 2H), 3.27 (*t*, *J* = 5.6 Hz, 2H), 1.69 (*t*, *J* = 2.8 Hz, 4H), 1.55-1.53 (*m*, 2H); <sup>13</sup>C NMR (100 MHz, CDCl<sub>3</sub>): δ 190.72, 164.89, 132.40, 131.39, 130.95, 130.10, 47.05, 42.26, 26.24, 25.44, 24.33.

***1-(3-Bromophenyl)-2-(piperidin-1-yl)ethane-1,2-dione***

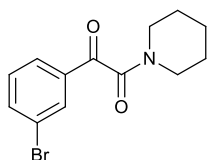

**3dc:** <sup>[3]</sup> Yellow oil

<sup>1</sup>H NMR (400 MHz, CDCl<sub>3</sub>): δ 8.10 (*s*, 1H), 7.88 (*d*, *J* = 8 Hz, 1H), 7.78 (*d*, *J* = 8 Hz, 1H), 7.41 (*t*, *J* = 7.6 Hz, 1H), 3.71 (*Br, s*, 2H), 3.30 (*t*, *J* = 5.6 Hz, 2H), 1.71 (*d*, *J* = 2.4

Hz, 4H), 1.57 (*Br, s*, 2H);  $^{13}\text{C}$  NMR (100 MHz,  $\text{CDCl}_3$ ):  $\delta$  190.33, 164.67, 137.47, 135.08, 132.24, 130.60, 128.25, 123.29, 47.09, 42.32, 26.24, 25.46, 24.35.

**1-(Piperidin-1-yl)-2-(o-tolyl)ethane-1,2-dione**

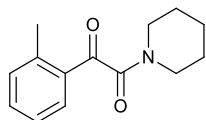

**3gc:** <sup>[6]</sup> Yellowish solid

$^1\text{H}$  NMR (400 MHz,  $\text{CDCl}_3$ ):  $\delta$  7.63 (*d*,  $J = 7.6$  Hz, 1H), 7.36 (*t*,  $J = 7.6$  Hz, 1H), 7.23-7.18 (*m*, 2H), 3.58 (*Br, s*, 2H), 3.19 (*t*,  $J = 5.6$  Hz, 2H), 2.56 (*s*, 3H), 1.57 (*Br, s*, 4H), 1.44 (*Br, s*, 2H);  $^{13}\text{C}$  NMR (100 MHz,  $\text{CDCl}_3$ ):  $\delta$  193.86, 166.03, 141.18, 133.59, 132.59, 132.53, 131.55, 126.12, 46.89, 41.98, 25.99, 25.33, 24.27, 21.71.

**1-(piperidin-1-yl)-2-(m-tolyl)ethane-1,2-dione**

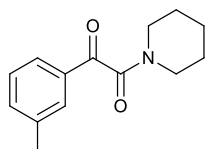

**3hc:** <sup>[5]</sup> Yellow solid

$^1\text{H}$  NMR (400 MHz,  $\text{CDCl}_3$ ):  $\delta$  7.52 (*d*,  $J = J = 8.8$  Hz, 2H), 7.22 (*d*,  $J = 7.6$  Hz, 1H), 7.17 (*t*,  $J = 7.2$  Hz, 1H), 3.46 (*s*, 2H), 3.04 (*t*,  $J = 5.6$  Hz, 2H), 2.17 (*s*, 3H), 1.43 (*s*, 4H), 1.29 (*s*, 2H);  $^{13}\text{C}$  NMR (100 MHz,  $\text{CDCl}_3$ ):  $\delta$  191.99, 165.32, 138.74, 135.37, 133.102, 129.49, 128.79, 126.61, 46.74, 41.79, 25.99, 25.30, 24.12, 21.00.

**1-(Piperidin-1-yl)-2-(p-tolyl)ethane-1,2-dione**

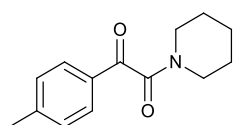

**3ic:** <sup>[6]</sup> Yellow oil

$^1\text{H}$  NMR (400 MHz,  $\text{CDCl}_3$ ):  $\delta$  7.82 (*d*,  $J = 7.6$  Hz, 2H), 7.29 (*d*,  $J = 7.6$  Hz, 2H), 3.68 (*Br, s*, 2H), 3.26 (*t*,  $J = 5.2$  Hz, 2H), 2.41 (*s*, 3H), 1.67 (*s*, 4H), 1.53 (*d*,  $J = 5.2$  Hz, 3H);  $^{13}\text{C}$  NMR (100 MHz,  $\text{CDCl}_3$ ):  $\delta$  191.73, 165.66, 145.91, 129.73, 129.65, 47.01, 42.07, 26.18, 25.44, 24.36, 21.87.

**1-(4-Methylpiperidin-1-yl)-2-phenylethane-1,2-dione**

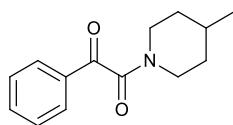

**3ad:** <sup>[3]</sup> Yellow oil

<sup>1</sup>H NMR (400 MHz, CDCl<sub>3</sub>): δ 7.95 (*d*, *J* = 7.6 Hz, 2H), 7.65 (*t*, *J* = 7.2 Hz, 1H), 7.52 (*t*, *J* = 7.6 Hz, 2H), 4.64 (*d*, *J* = 13.2 Hz, 1H), 3.53 (*d*, *J* = 13.6 Hz, 1H), 3.07 (*t*, *J* = 12 Hz, 1H), 2.84-2.70 (*m*, 1H), 1.83-1.57 (*m*, 3H), 1.27-1.10 (*m*, 2H), 0.99 (*d*, *J* = 6 Hz, 3H); <sup>13</sup>C NMR (100 MHz, CDCl<sub>3</sub>): δ 191.98, 165.46, 134.70, 133.25, 129.58, 129.03, 46.34, 41.53, 34.28, 33.59, 31.04, 21.63.

***tert-butyl 4-(2-oxo-2-phenylacetyl)piperazine-1-carboxylate***

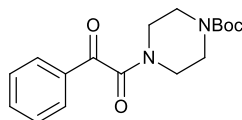

**3ae:** <sup>[7]</sup> Yellow oil

<sup>1</sup>H NMR (400 MHz, CDCl<sub>3</sub>): δ 7.96 (*d*, *J* = 8 Hz, 2H), 7.68-7.64 (*m*, 1H), 7.52 (*t*, *J* = 7.6 Hz, 2H), 3.76-3.75 (*m*, 2H), 3.58-3.56 (*m*, 2H), 3.44-3.43 (*m*, 2H), 3.35-3.34 (*m*, 2H), 1.47 (*s*, 9H); <sup>13</sup>C NMR (100 MHz, CDCl<sub>3</sub>): δ 191.18, 165.65, 154.44, 135.02, 130.05, 129.68, 129.14, 128.39, 80.69, 45.78, 41.22, 28.33.

***N,N-diethyl-2-oxo-2-phenylacetamide***

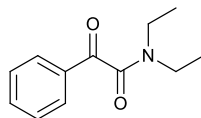

**3af:** <sup>[2]</sup> Yellow oil

<sup>1</sup>H NMR (400 MHz, CDCl<sub>3</sub>): δ 7.97 (*d*, *J* = 7.6 Hz, 2H), 7.67 (*t*, *J* = 7.6 Hz, 1H), 7.54 (*t*, *J* = 7.2 Hz, 2H), 3.60 (*q*, *J* = 7.2 Hz, 2H), 3.28 (*q*, *J* = 7.2 Hz, 2H), 1.32 (*t*, *J* = 7.2 Hz, 3H), 1.19 (*t*, *J* = 7.2 Hz, 3H); <sup>13</sup>C NMR (100 MHz, CDCl<sub>3</sub>): δ 191.61, 166.76, 134.58, 133.28, 129.63, 128.97, 42.13, 38.82, 14.12, 12.86.

**4. <sup>1</sup>H NMR and <sup>13</sup>C NMR spectrum for isolated products**



***<sup>1</sup>H NMR for 1-morpholino-2-phenylethane-1,2-dione (3aa)***

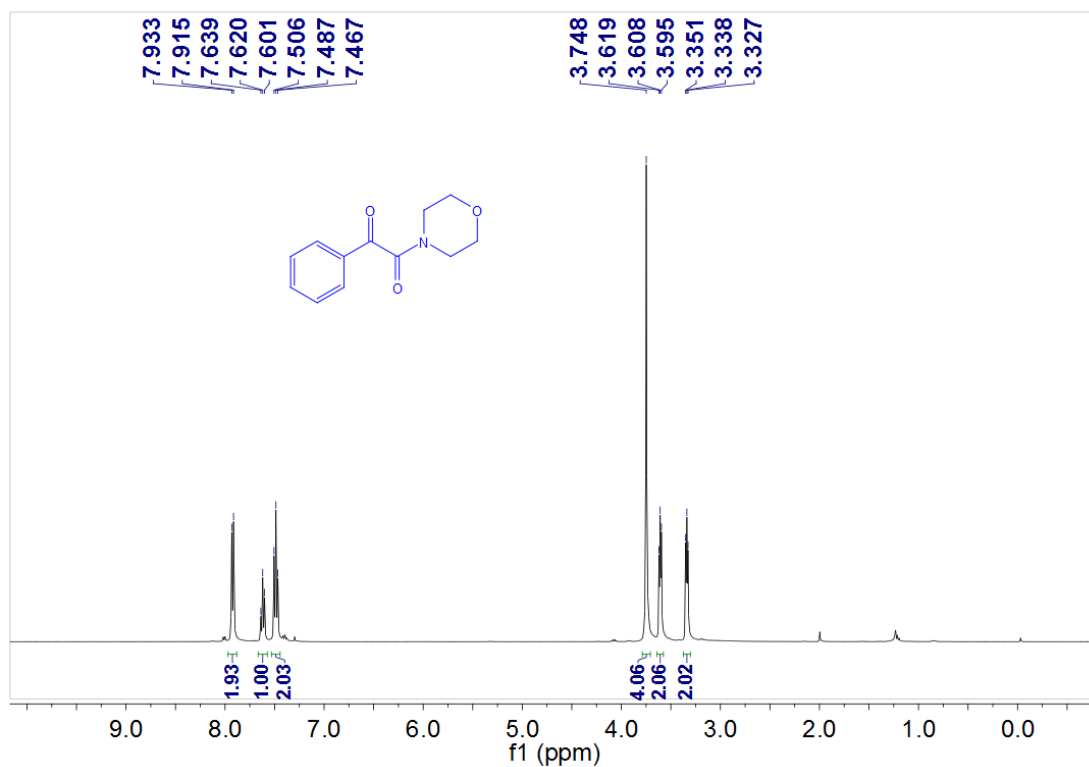

***<sup>13</sup>C NMR for 1-morpholino-2-phenylethane-1,2-dione (3aa)***

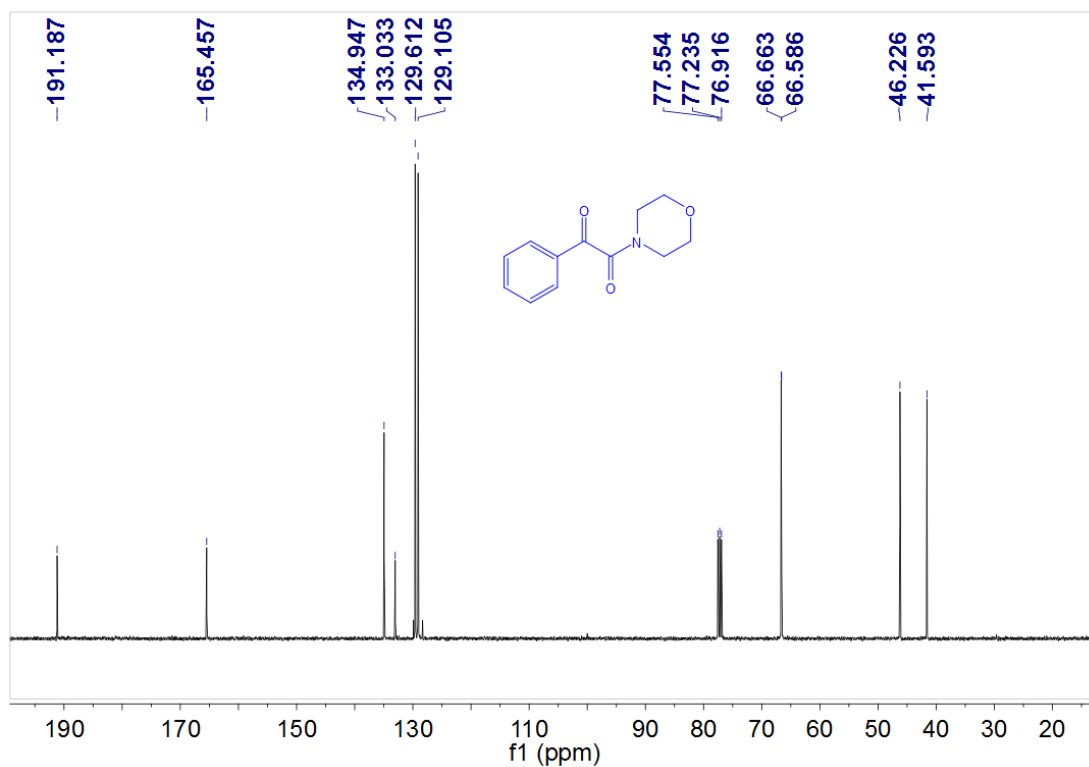

***<sup>1</sup>H NMR for 1-morpholino-2-(4-nitrophenyl)ethane-1,2-dione (3ba)***

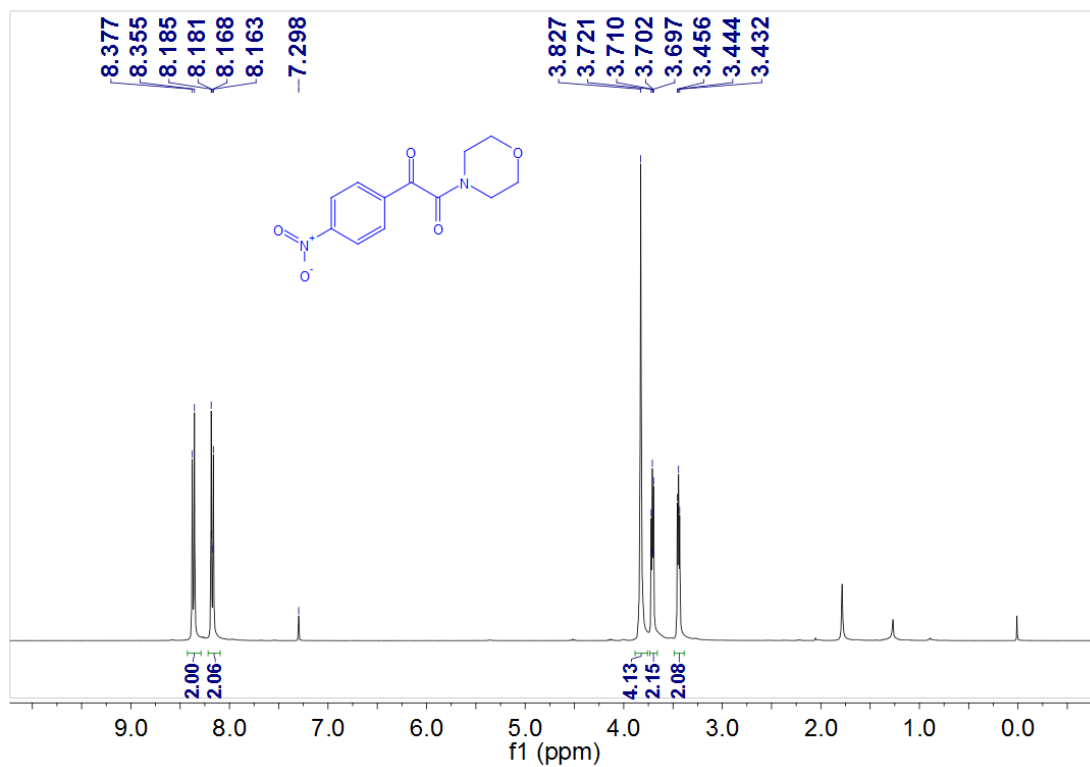

**<sup>13</sup>C NMR for 1-morpholino-2-(4-nitrophenyl)ethane-1,2-dione (3ba)**

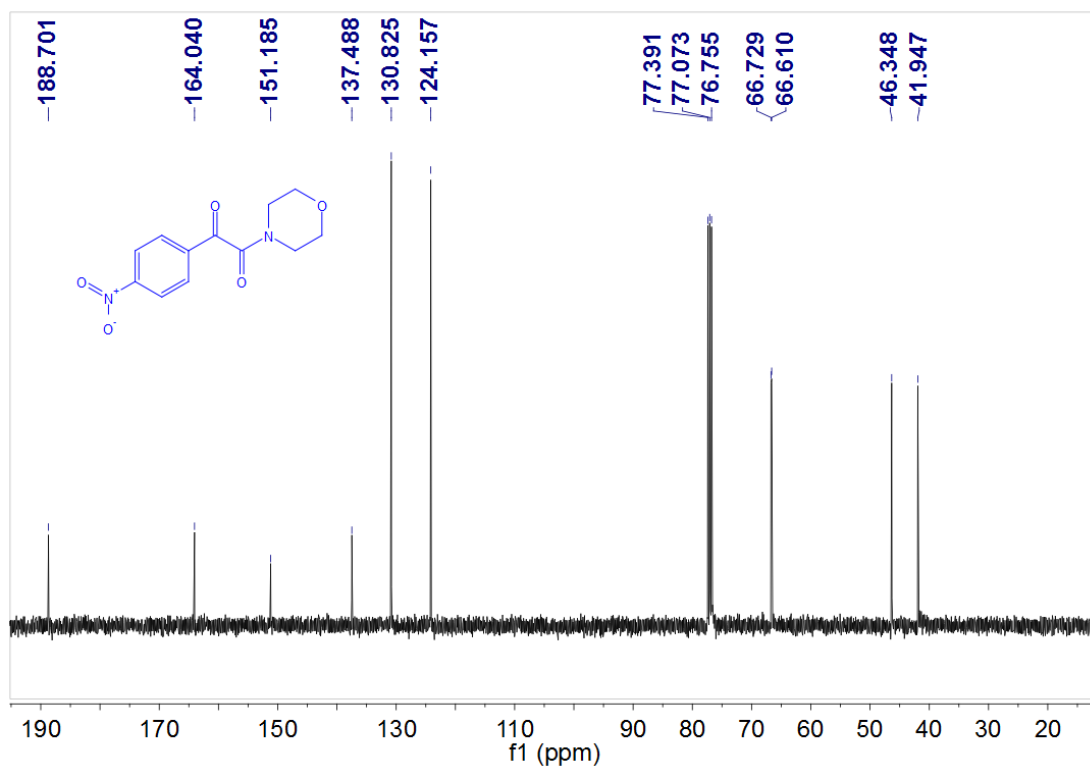

**<sup>1</sup>H NMR for 1-(4-Bromophenyl)-2-morpholinoethane-1,2-dione (3ca)**

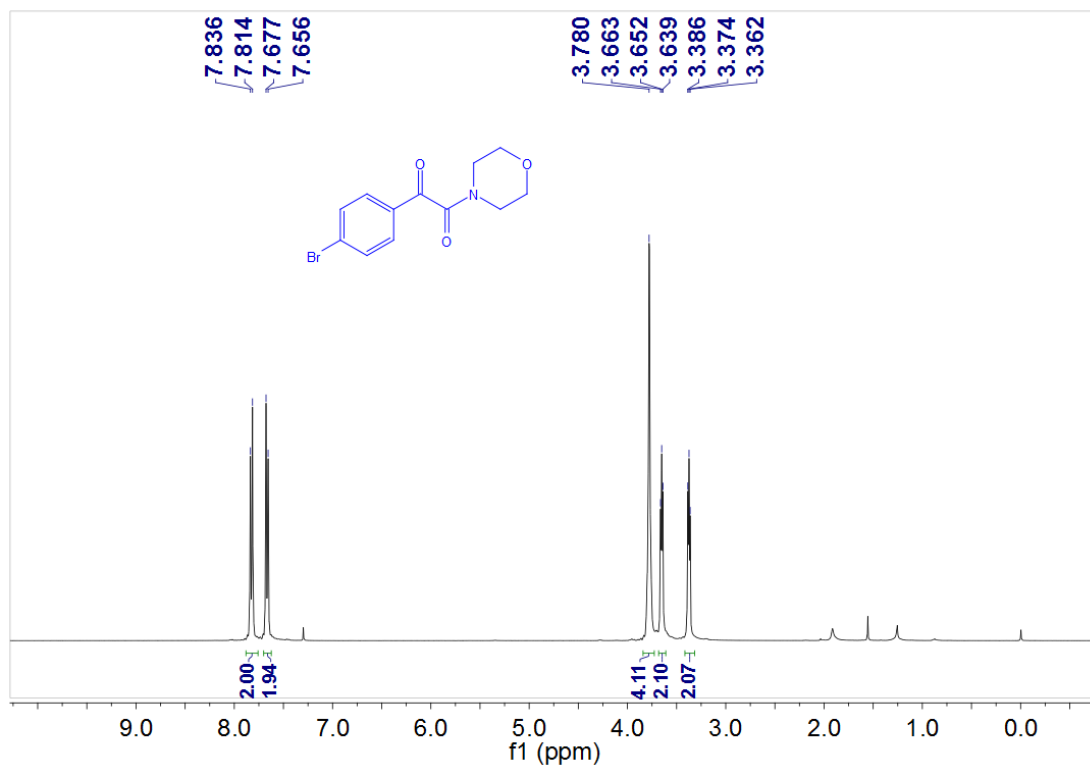

**<sup>13</sup>C NMR for 1-(4-Bromophenyl)-2-morpholinoethane-1,2-dione (3ca)**

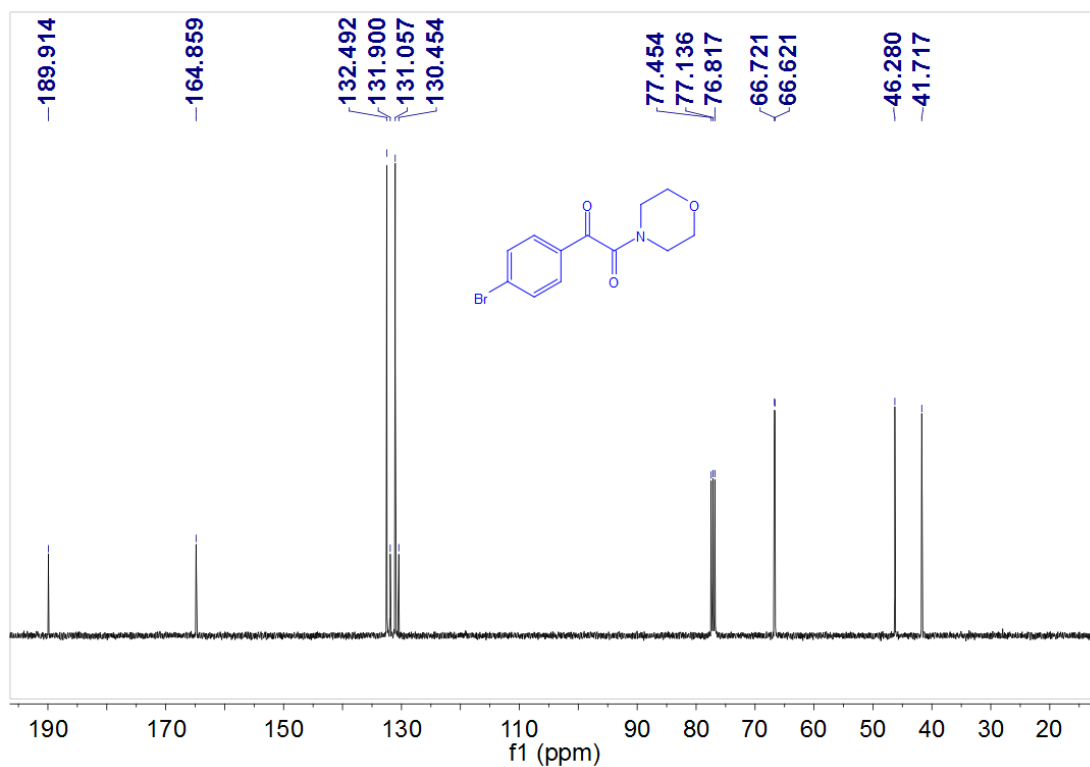

**<sup>1</sup>H NMR for 1-(3-Bromophenyl)-2-morpholinoethane-1,2-dione (3da)**

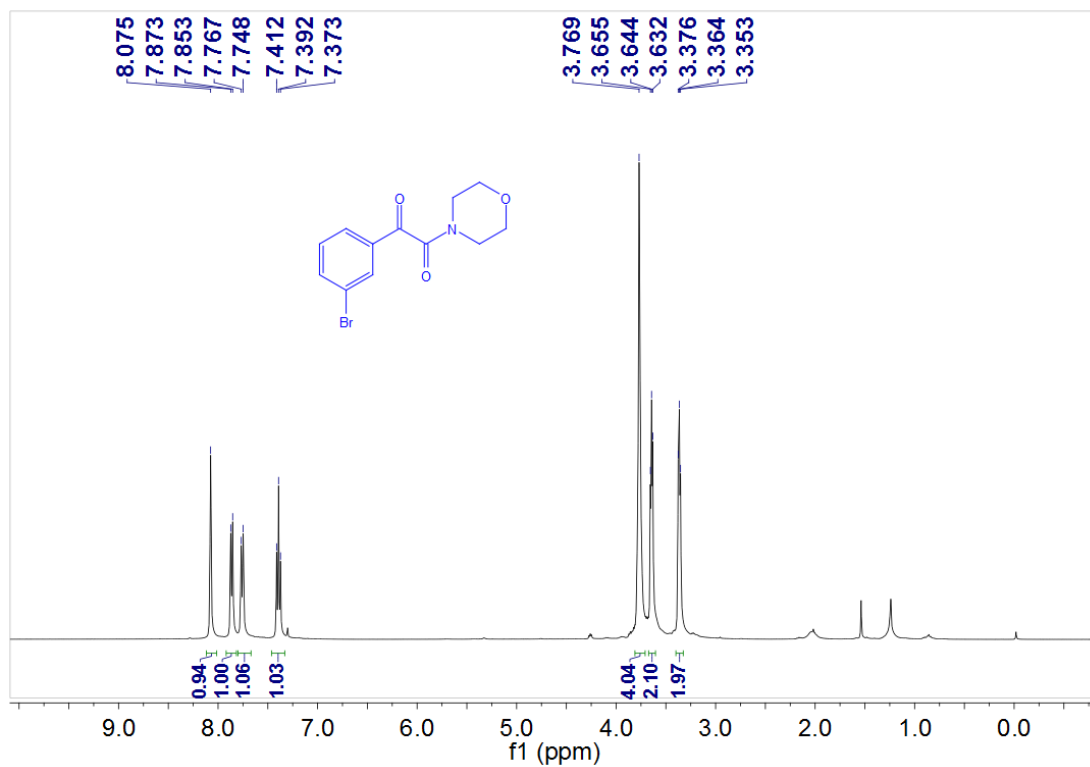

**<sup>13</sup>C NMR for 1-(3-bromophenyl)-2-morpholinoethane-1,2-dione (3da)**

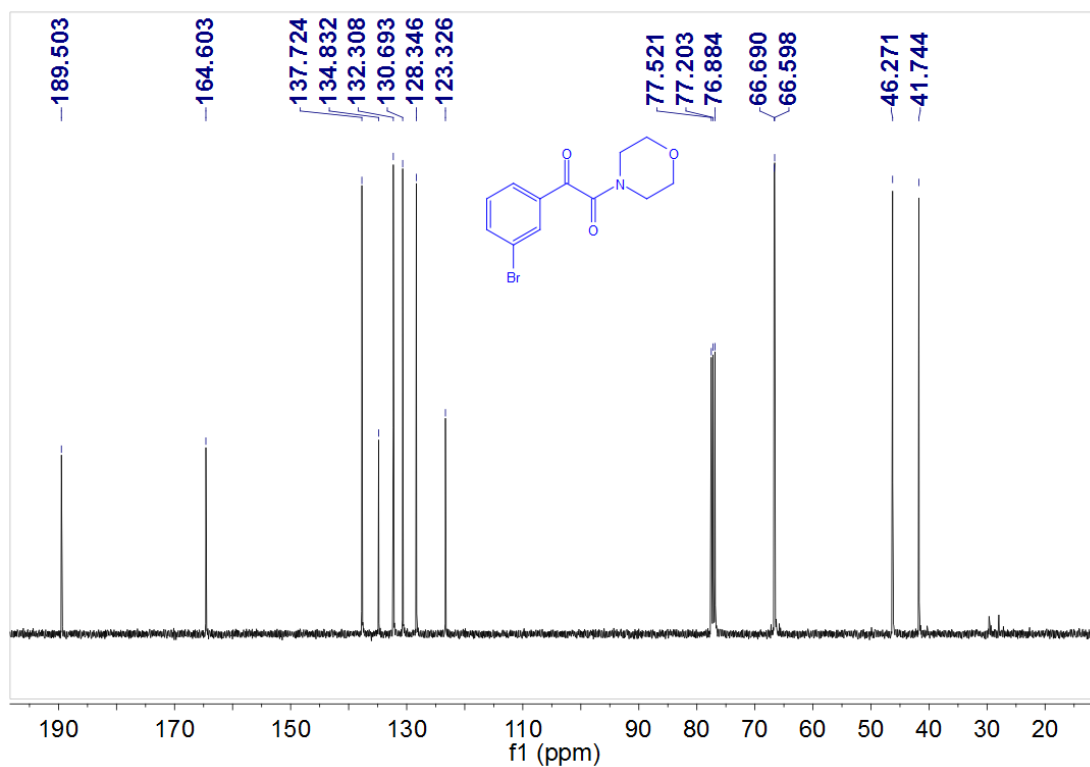

**<sup>1</sup>H NMR for 1-(2-bromophenyl)-2-morpholinoethane-1,2-dione (3ea)**

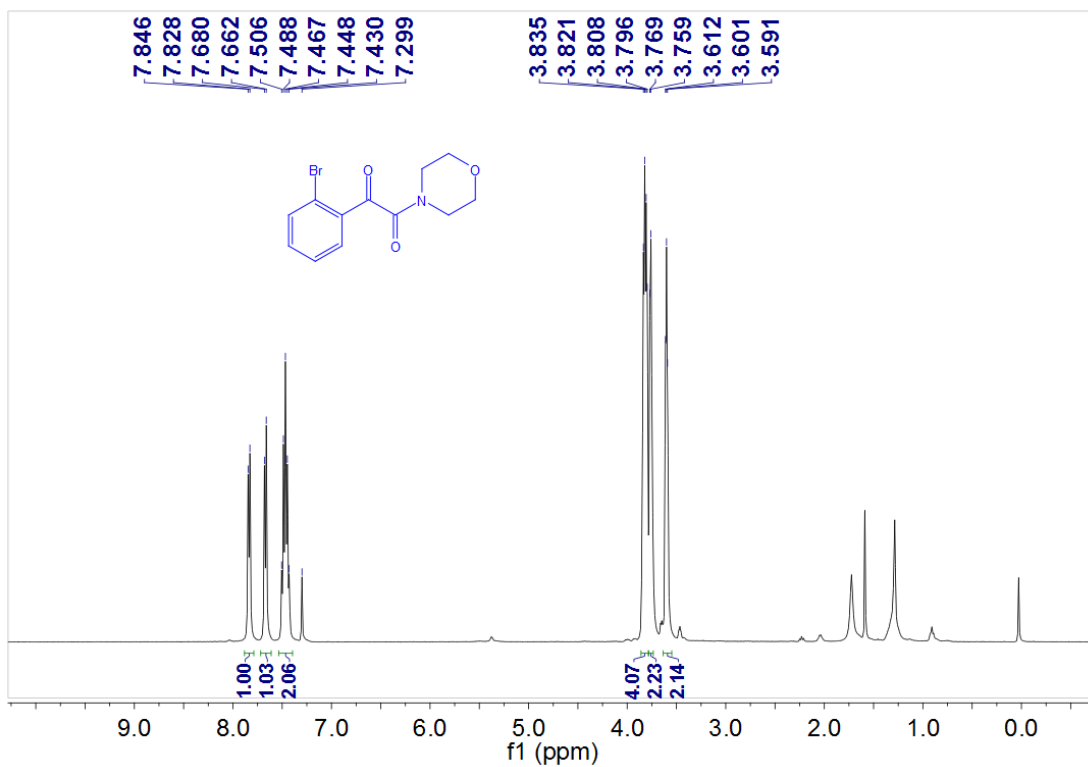

**<sup>13</sup>C NMR for 1-(2-bromophenyl)-2-morpholinoethane-1,2-dione (3ea)**

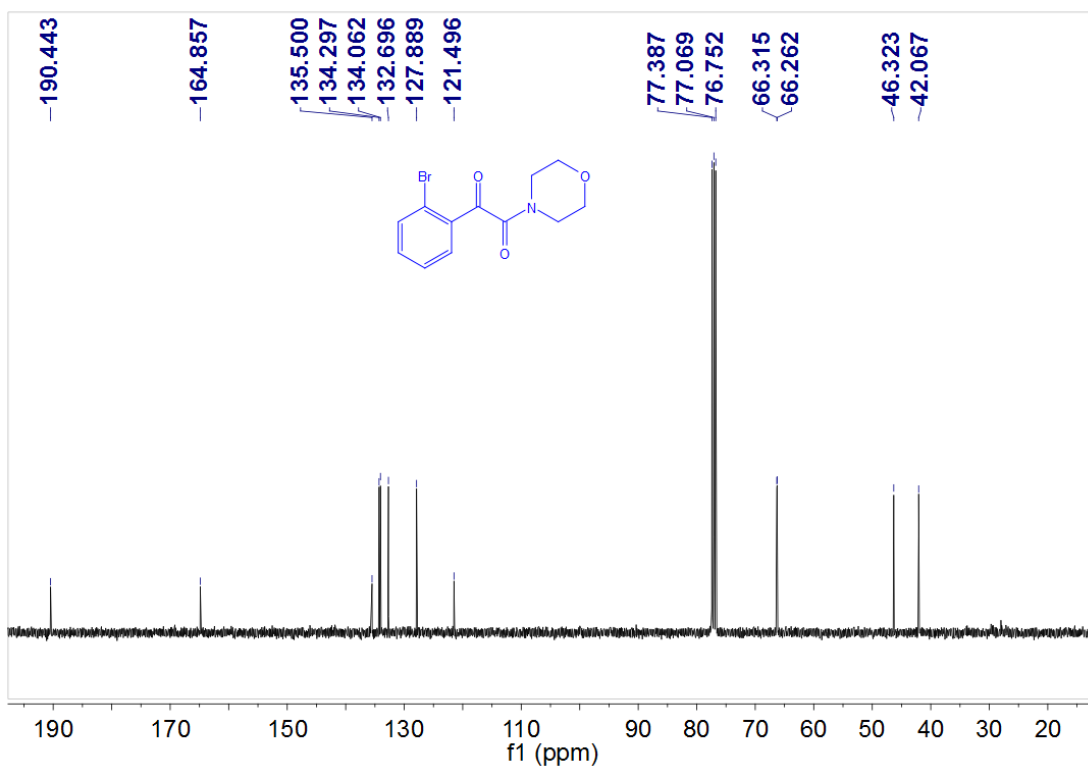

**<sup>1</sup>H NMR for 1-(4-ethylphenyl)-2-morpholinoethane-1,2-dione (3fa)**

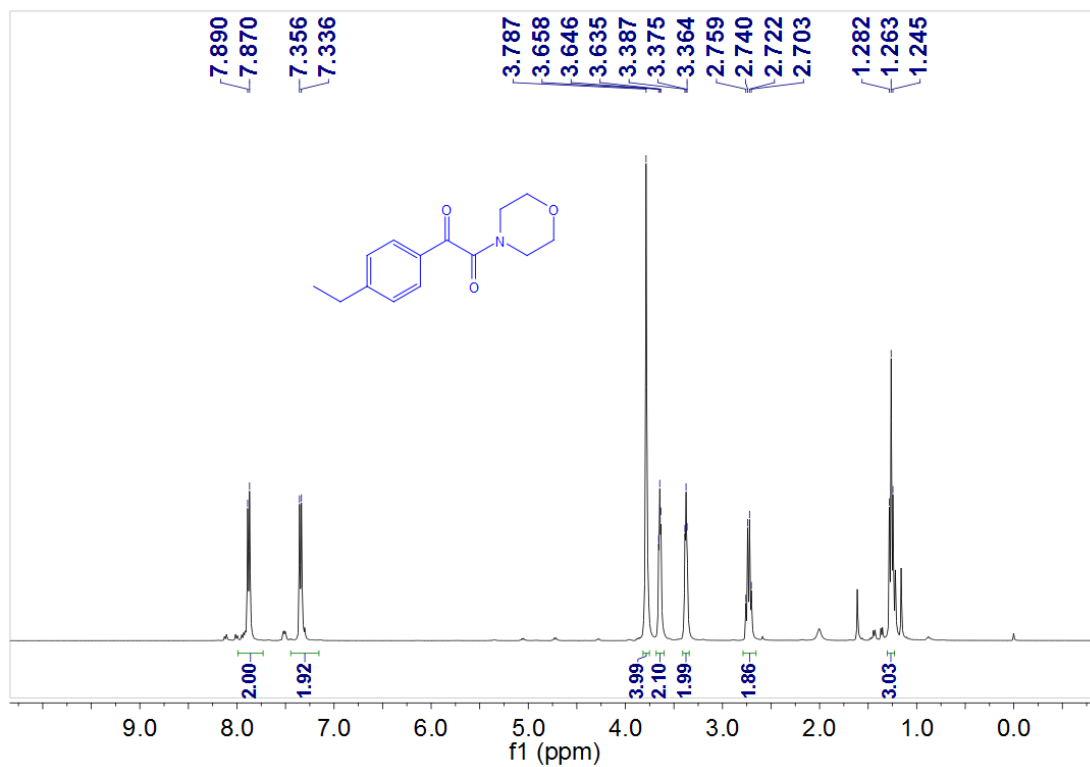

**<sup>13</sup>C NMR for 1-(4-ethylphenyl)-2-morpholinoethane-1,2-dione (3fa)**

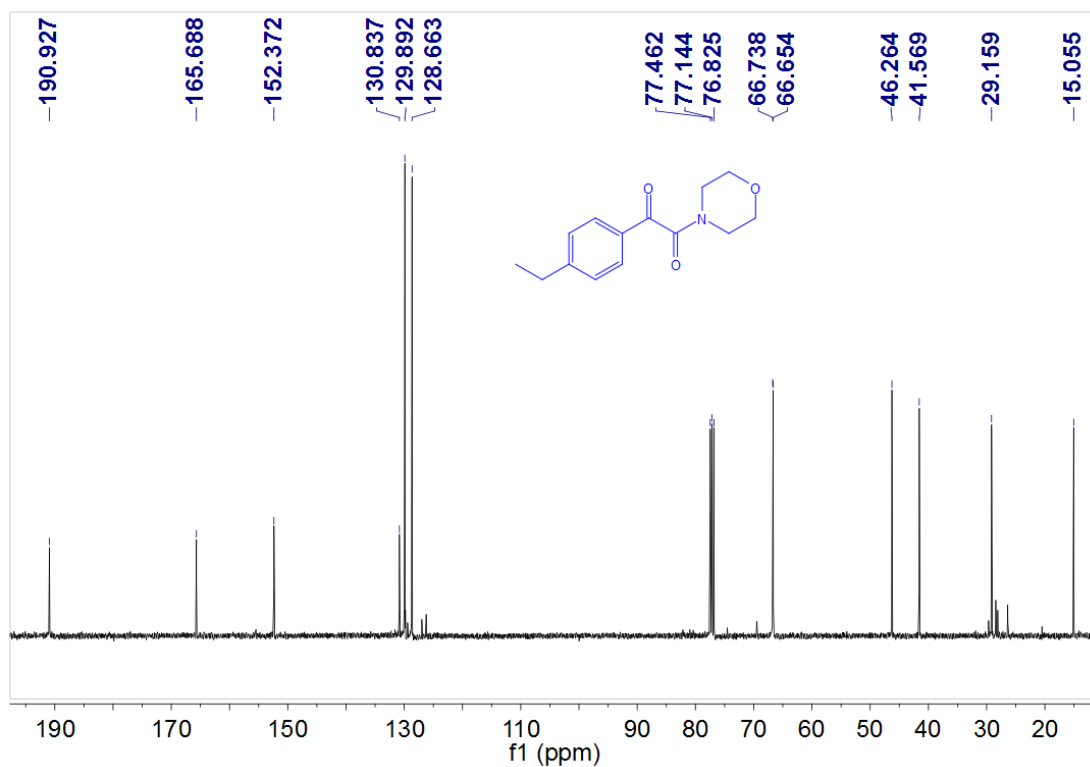

**<sup>1</sup>H NMR for 1-Morpholino-2-(o-tolyl)ethane-1,2-dione (3ga)**

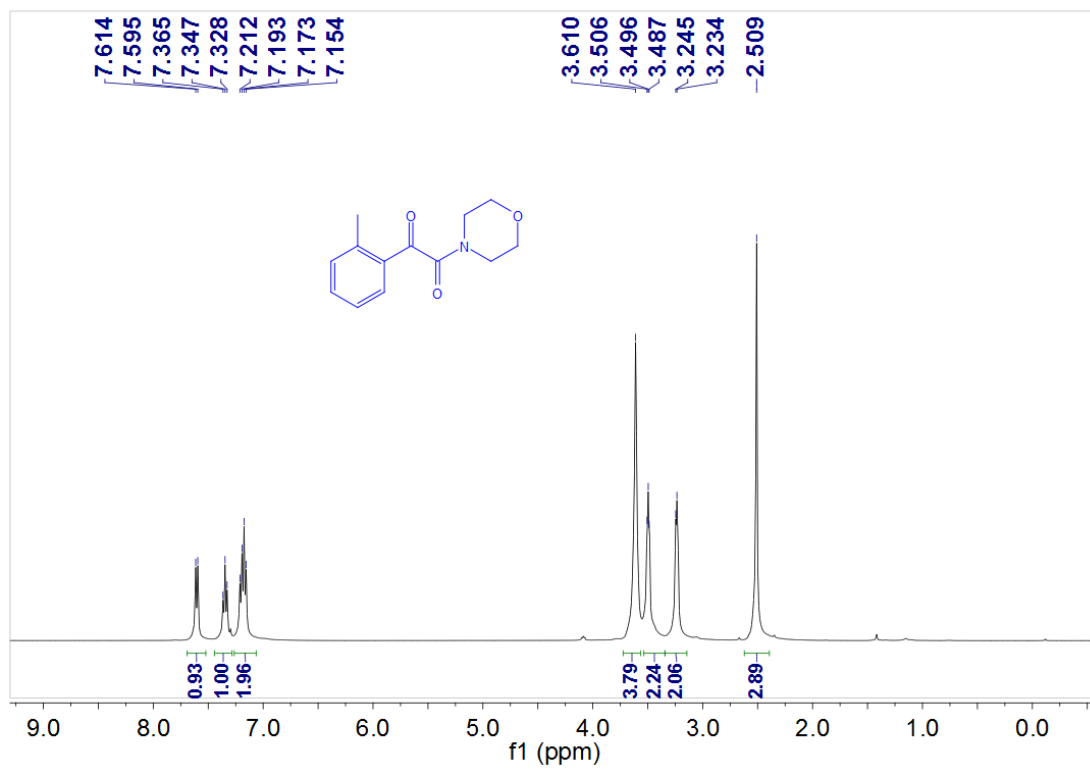

**<sup>13</sup>C NMR for 1-Morpholino-2-(o-tolyl)ethane-1,2-dione (3ga)**

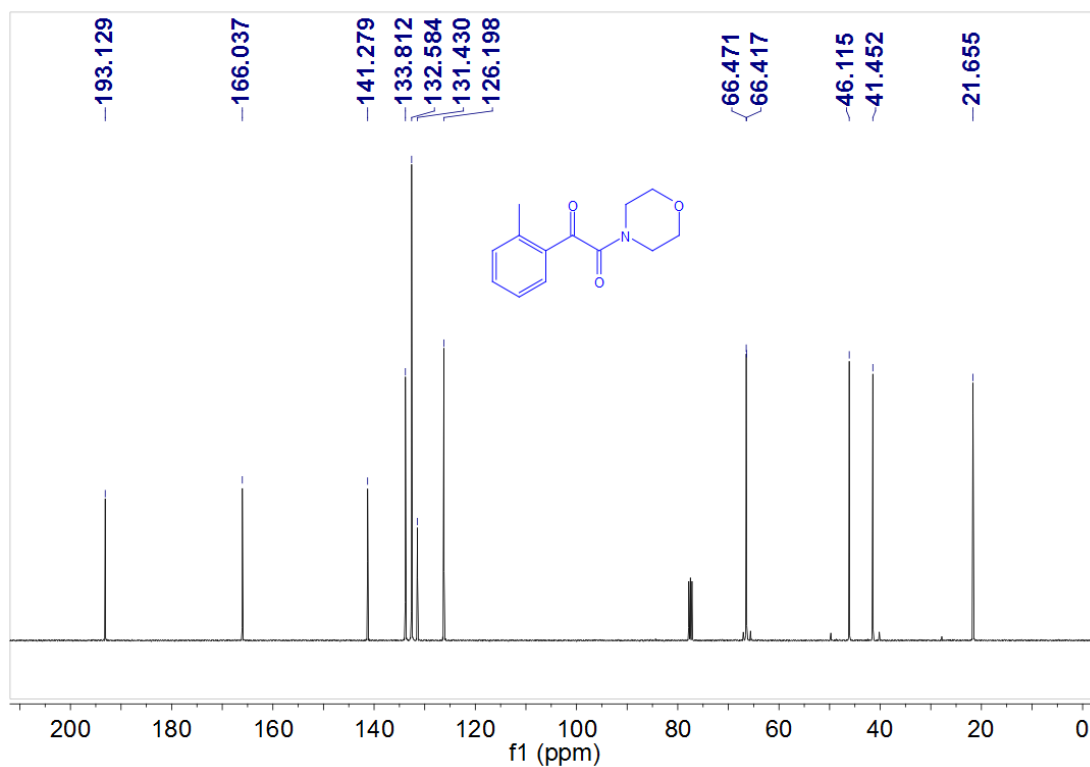

**<sup>1</sup>H NMR for 1-Phenyl-2-(pyrrolidin-1-yl)ethane-1,2-dione (3ab)**

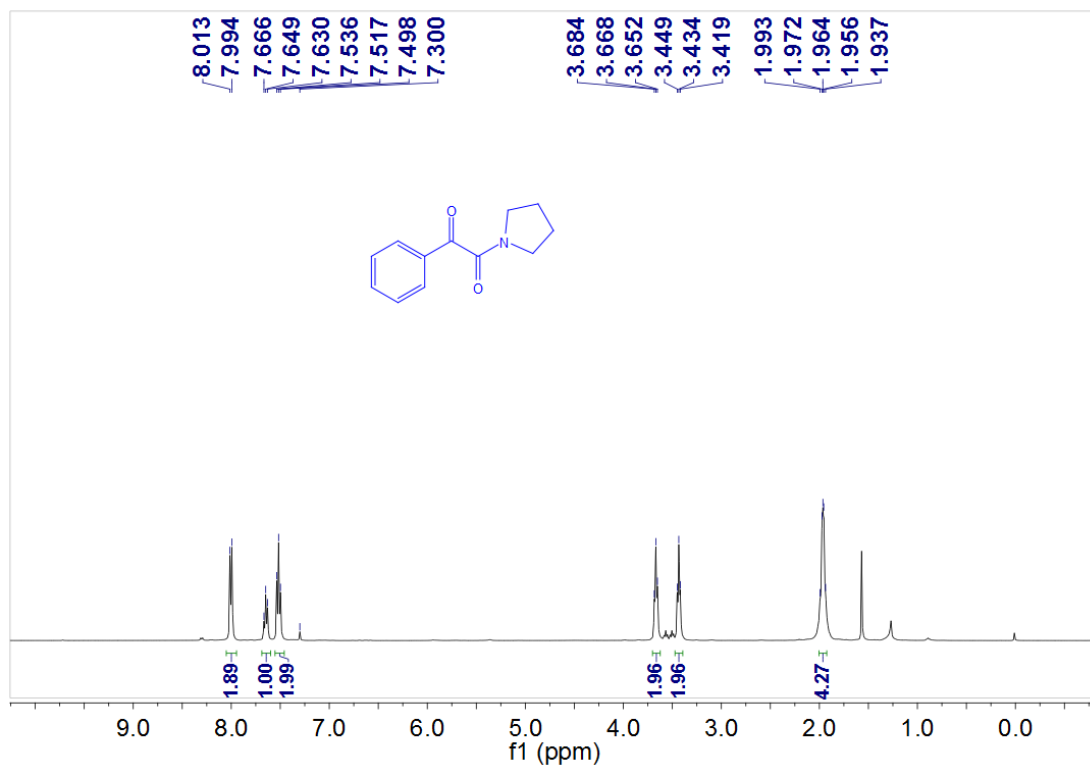

**<sup>13</sup>C NMR for 1-Phenyl-2-(pyrrolidin-1-yl)ethane-1,2-dione (3ab)**

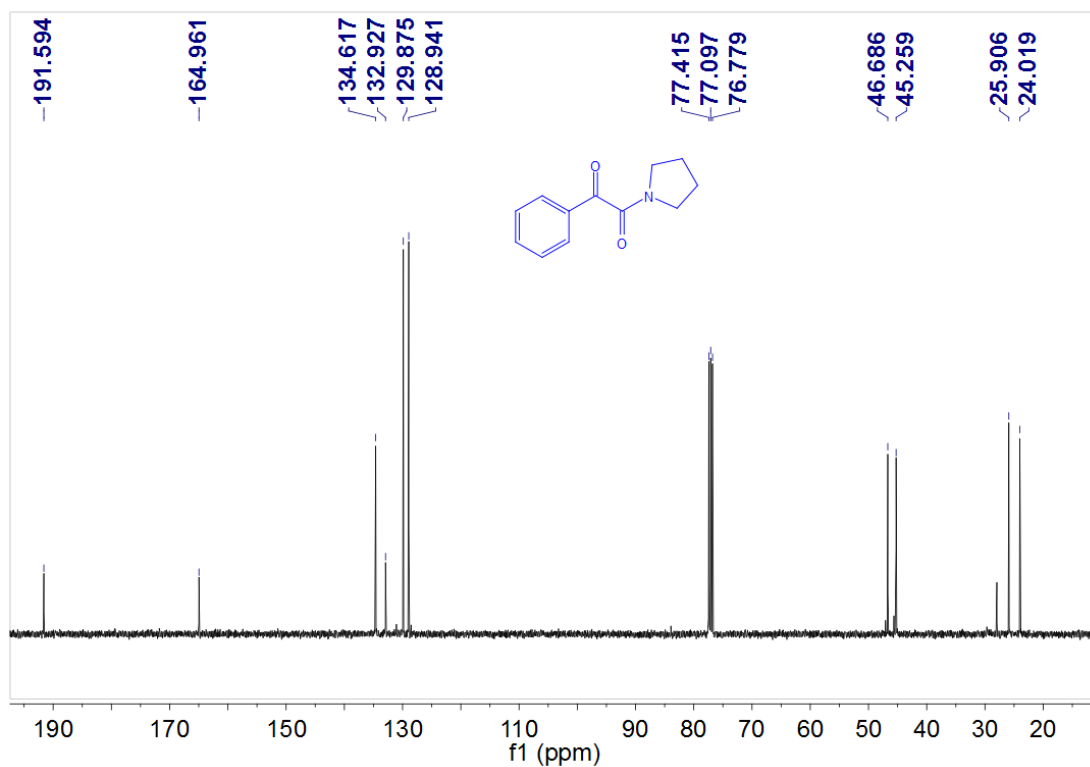

**<sup>1</sup>H NMR for 1-(4-nitrophenyl)-2-(pyrrolidin-1-yl)ethane-1,2-dione (3bb)**



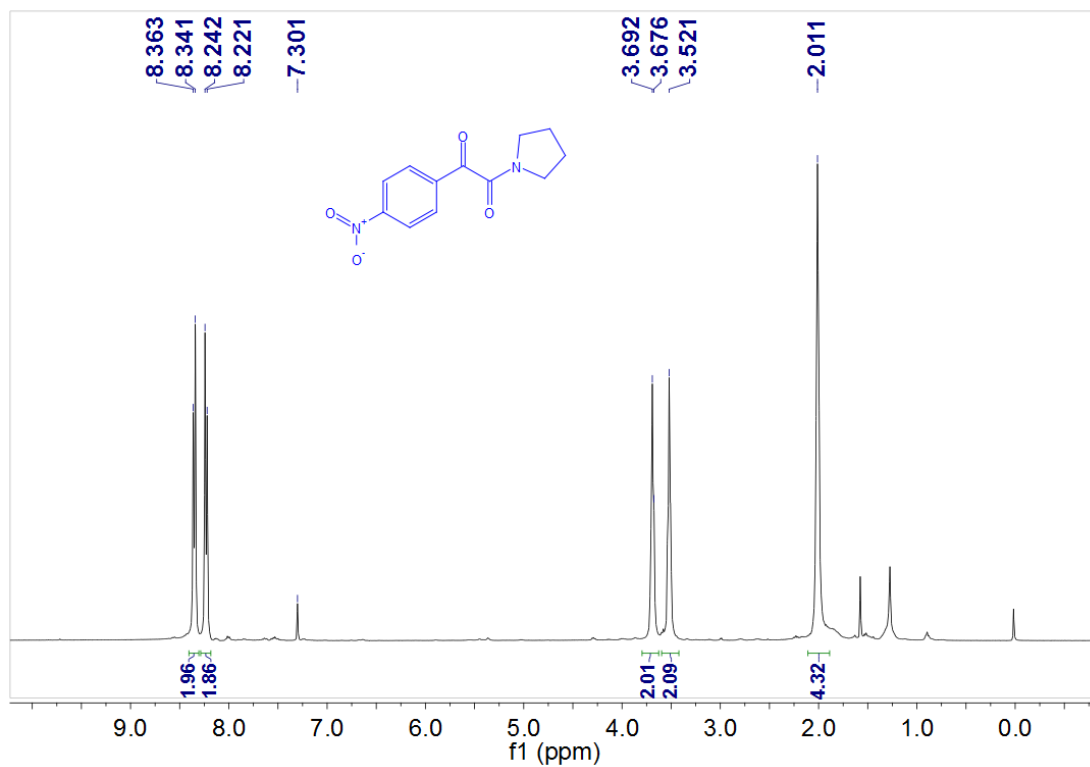

**<sup>13</sup>C NMR for 1-(4-nitrophenyl)-2-(pyrrolidin-1-yl)ethane-1,2-dione (3bb)**

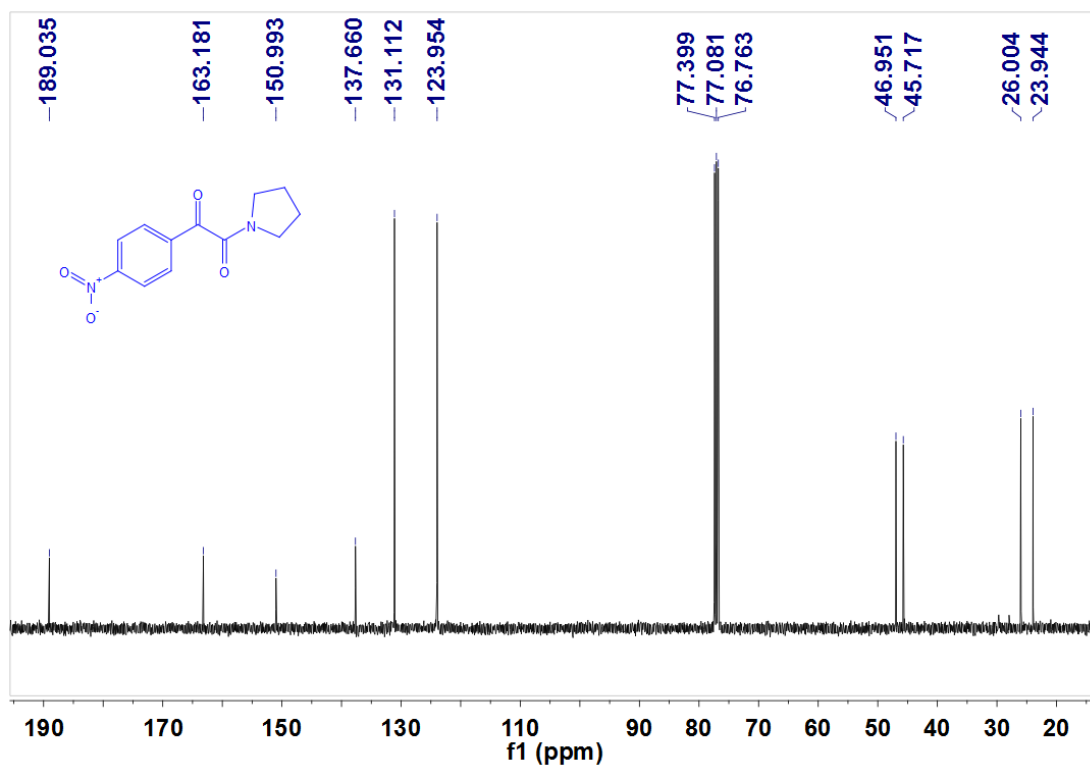

**<sup>1</sup>H NMR for 1-(4-bromophenyl)-2-(pyrrolidin-1-yl)ethane-1,2-dione (3cb)**

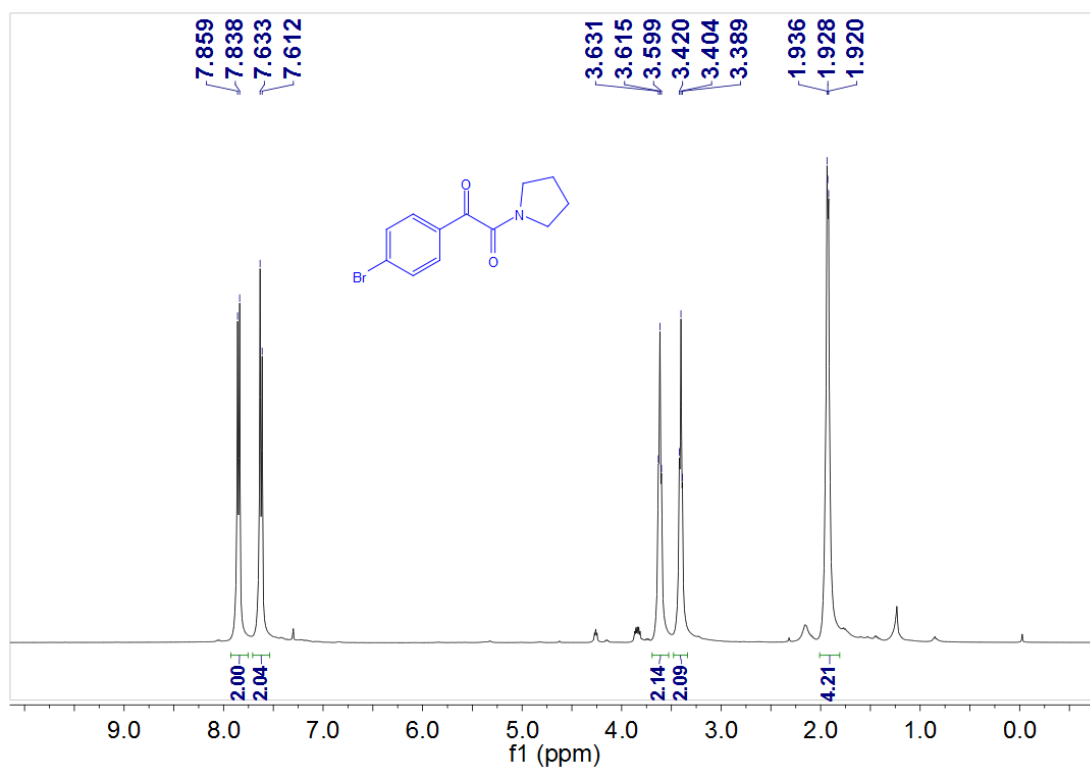

**<sup>13</sup>C NMR for 1-(4-bromophenyl)-2-(pyrrolidin-1-yl)ethane-1,2-dione (3cb)**

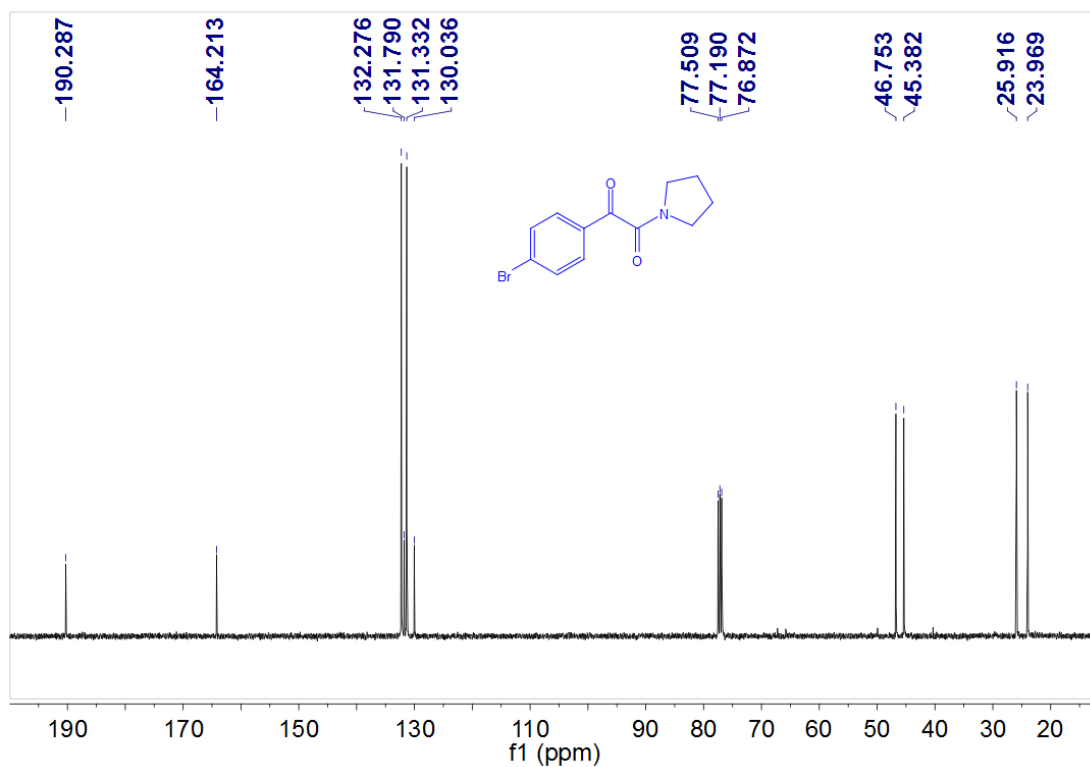

**<sup>1</sup>H NMR for 1-(pyrrolidin-1-yl)-2-(p-tolyl)ethane-1,2-dione (3ib)**

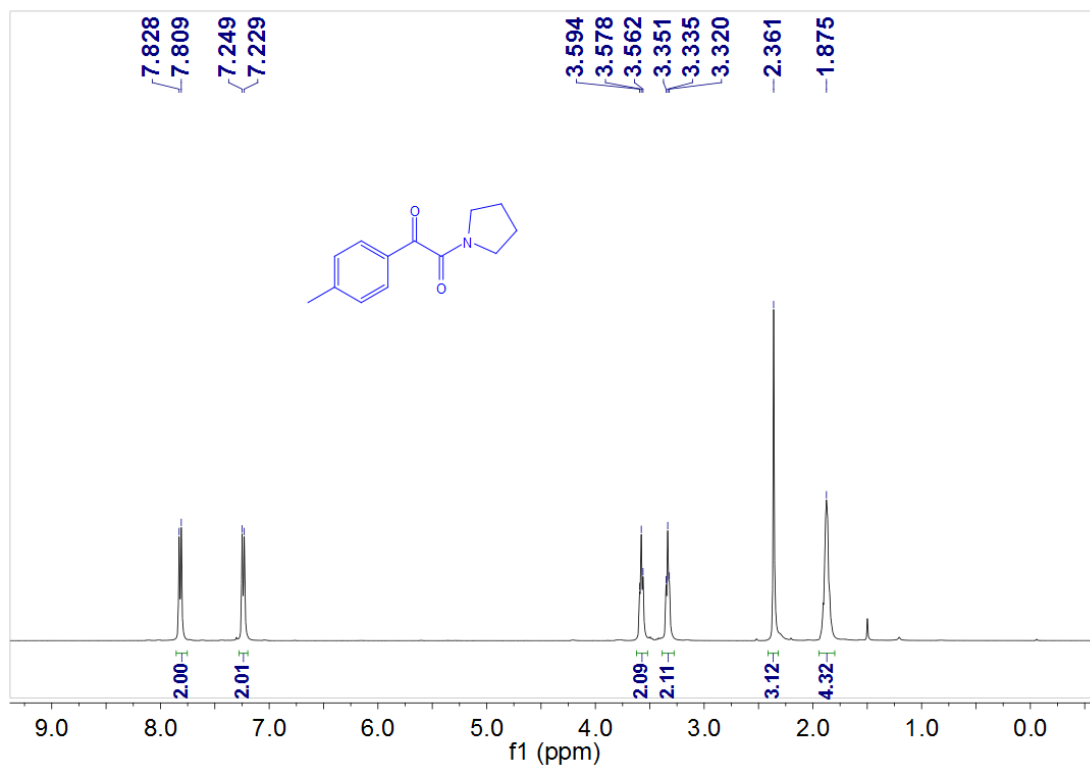

**<sup>13</sup>C NMR for 1-(pyrrolidin-1-yl)-2-(p-tolyl)ethane-1,2-dione (3ib)**

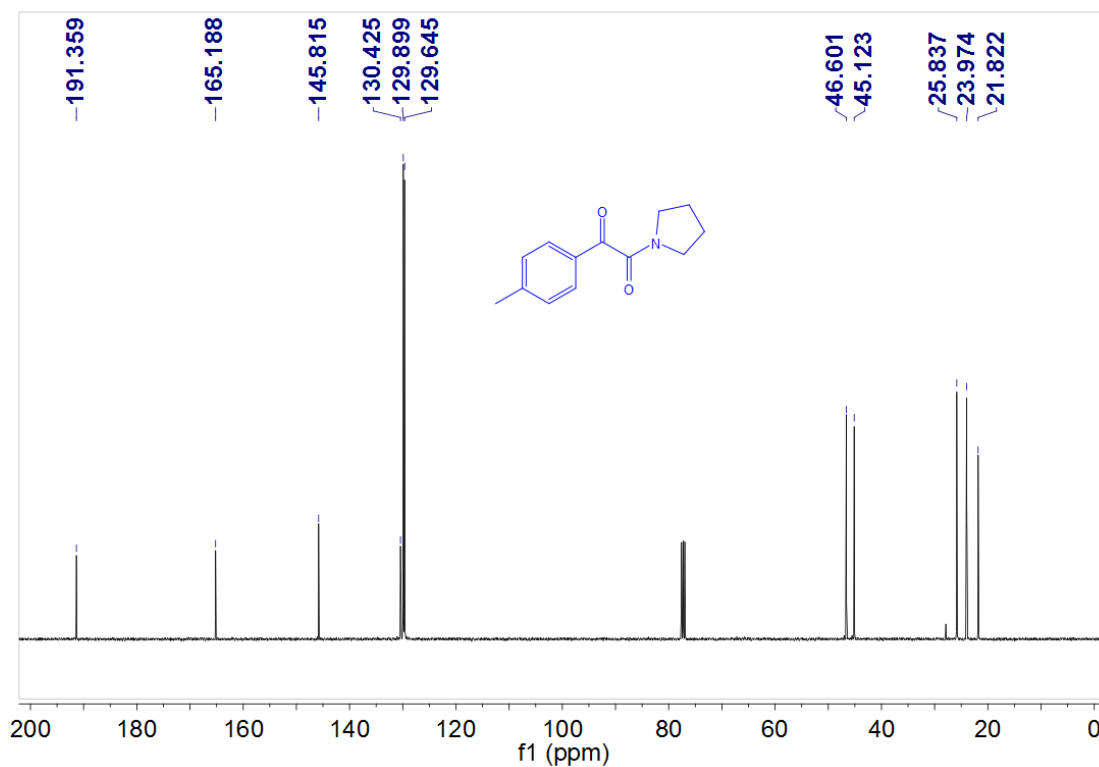

**<sup>1</sup>H NMR for 1-Phenyl-2-(piperidin-1-yl)ethane-1,2-dione (3ac)**

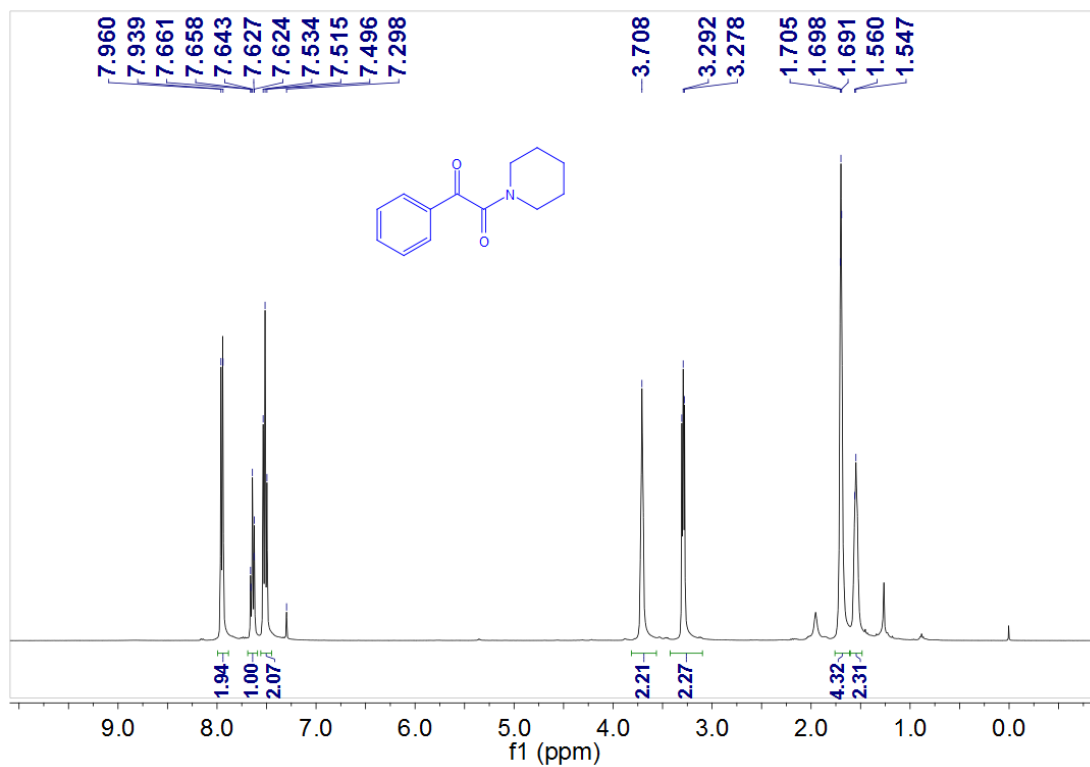

<sup>13</sup>C NMR for 1-Phenyl-2-(piperidin-1-yl)ethane-1,2-dione (3ac)

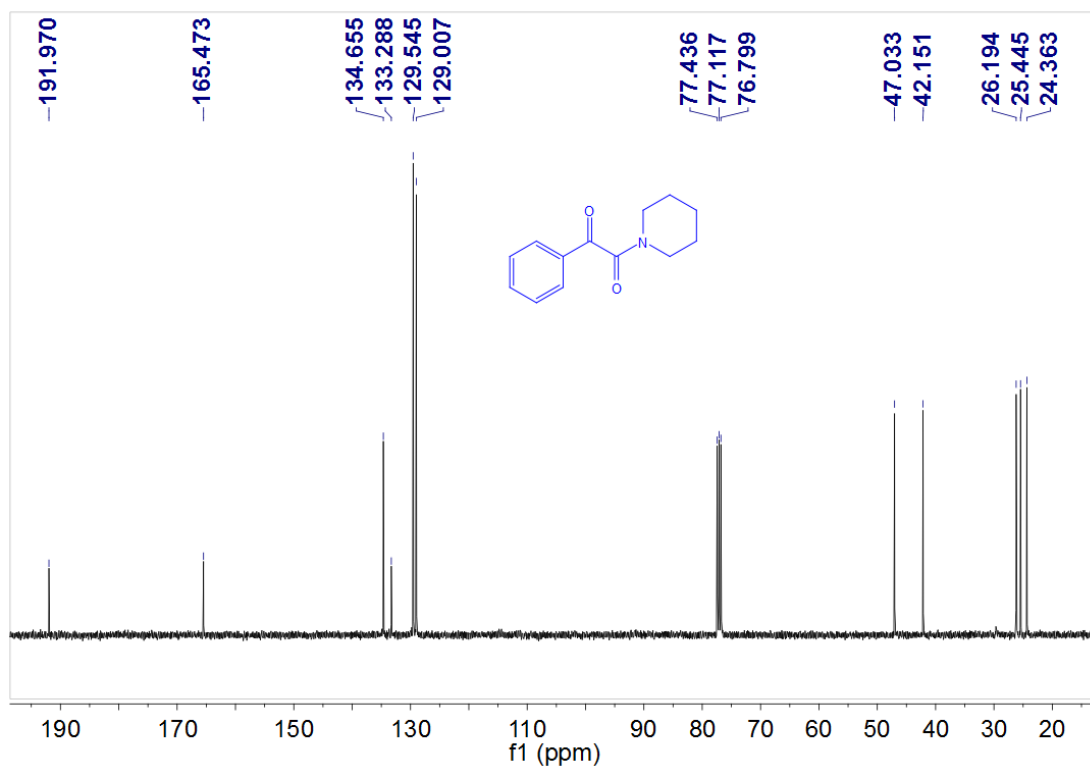

<sup>1</sup>H NMR for 1-(4-Nitrophenyl)-2-(piperidin-1-yl)ethane-1,2-dione (3bc)

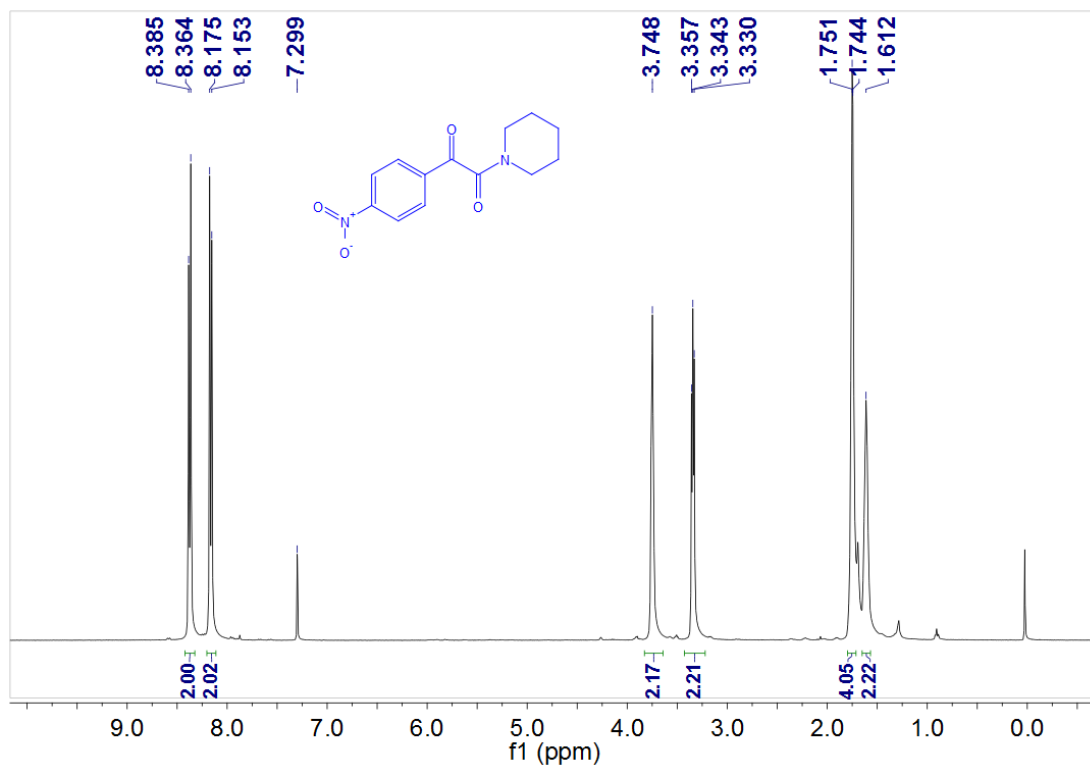

**<sup>13</sup>C NMR for 1-(4-nitrophenyl)-2-(piperidin-1-yl)ethane-1,2-dione (3bc)**

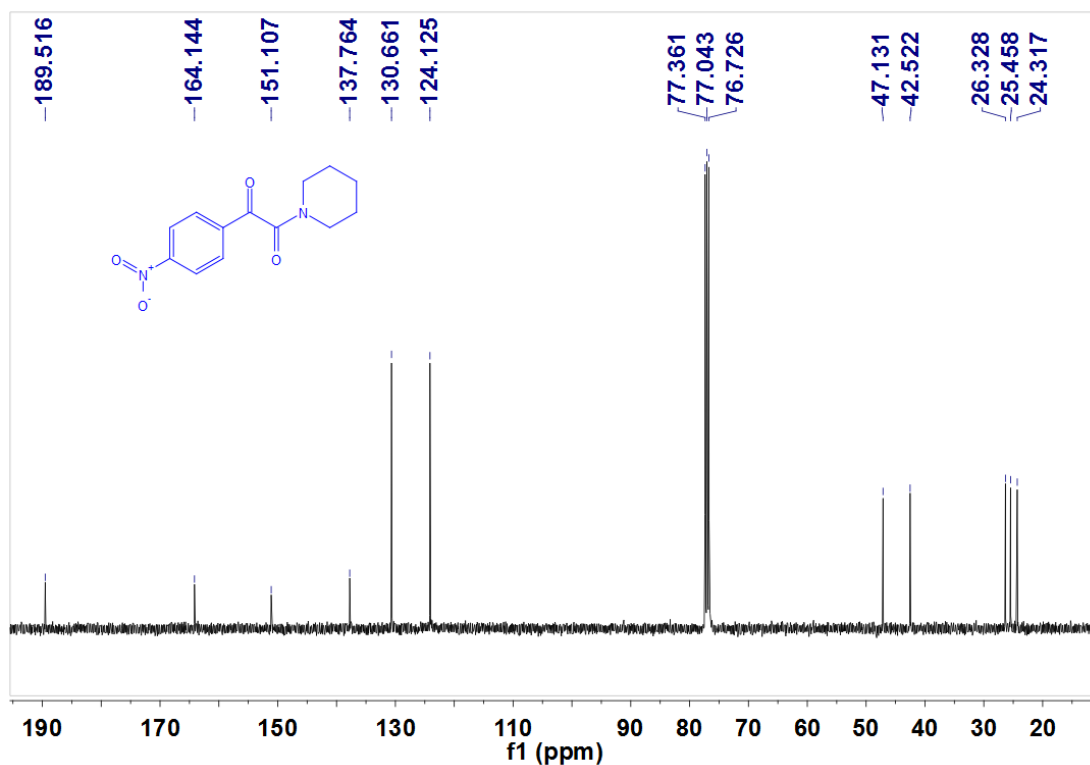

**<sup>1</sup>H NMR for 1-(4-bromophenyl)-2-(piperidin-1-yl)ethane-1,2-dione (3cc)**

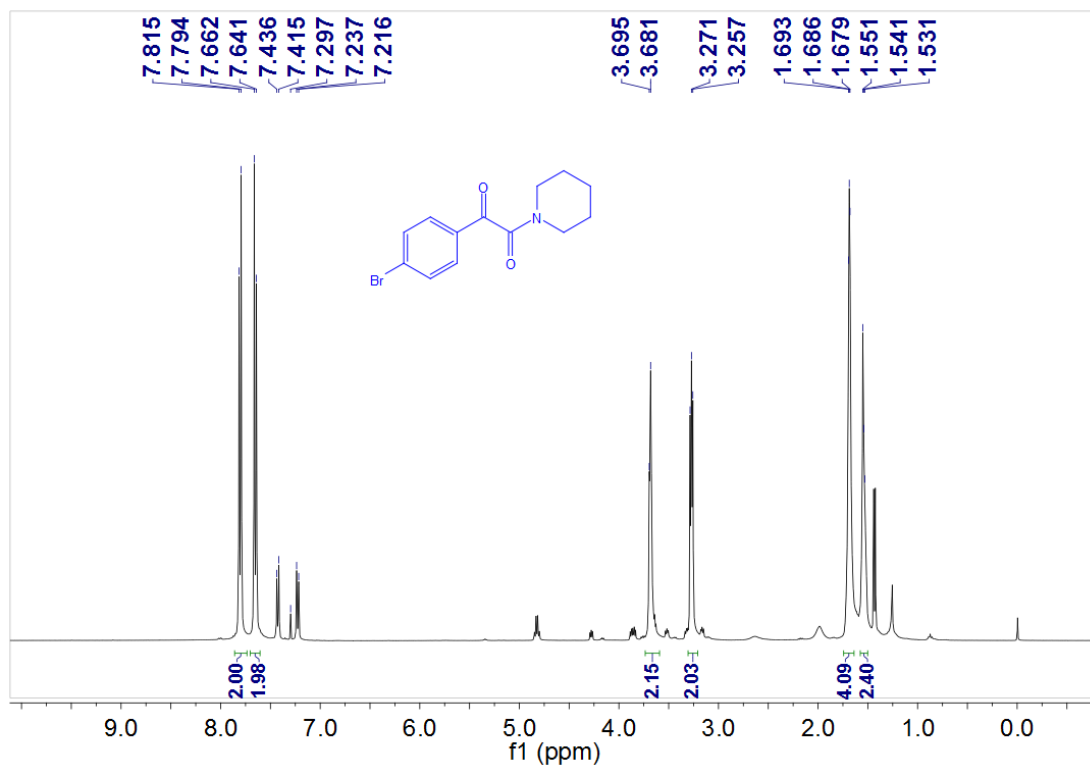

**<sup>13</sup>C NMR for 1-(4-Bromophenyl)-2-(piperidin-1-yl)ethane-1,2-dione (3cc)**

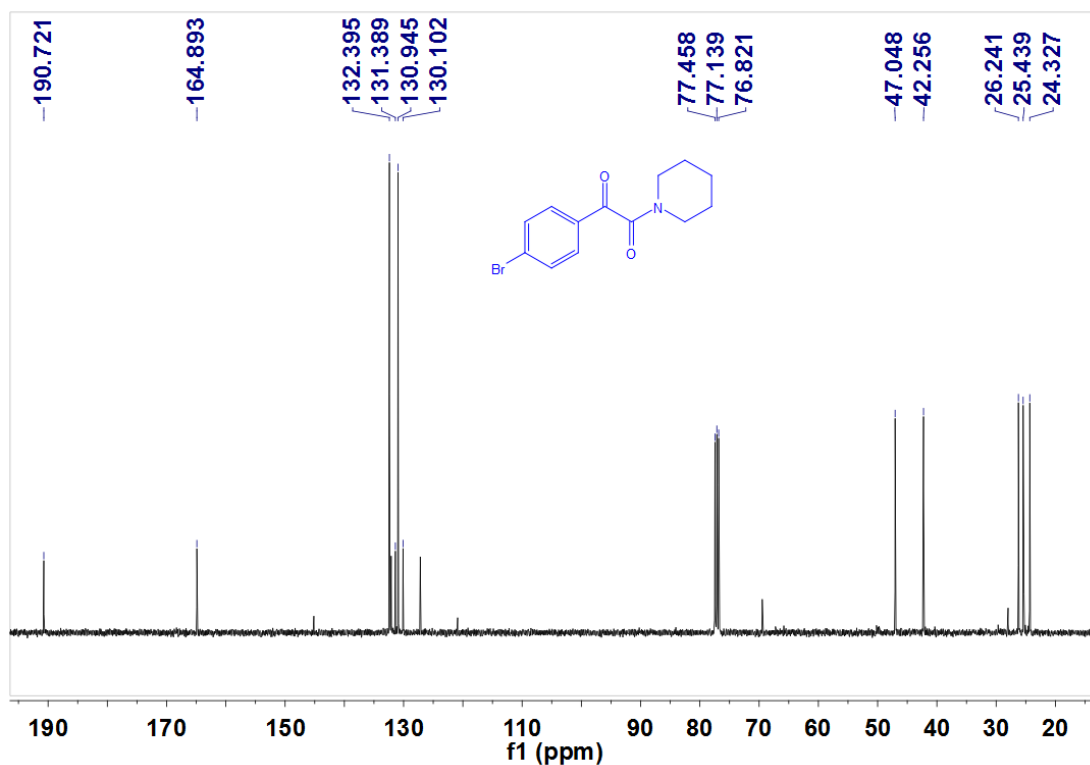

**<sup>1</sup>H NMR for 1-(3-Bromophenyl)-2-(piperidin-1-yl)ethane-1,2-dione (3dc)**

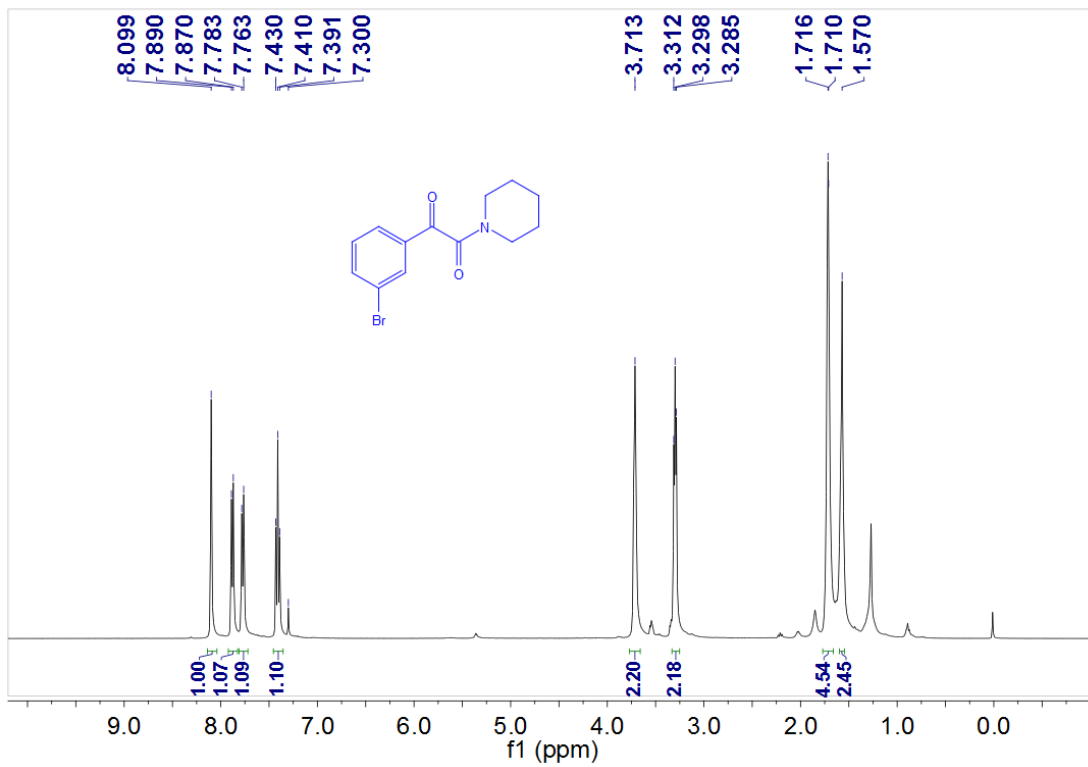

**<sup>13</sup>C NMR for 1-(3-Bromophenyl)-2-(piperidin-1-yl)ethane-1,2-dione (3dc)**

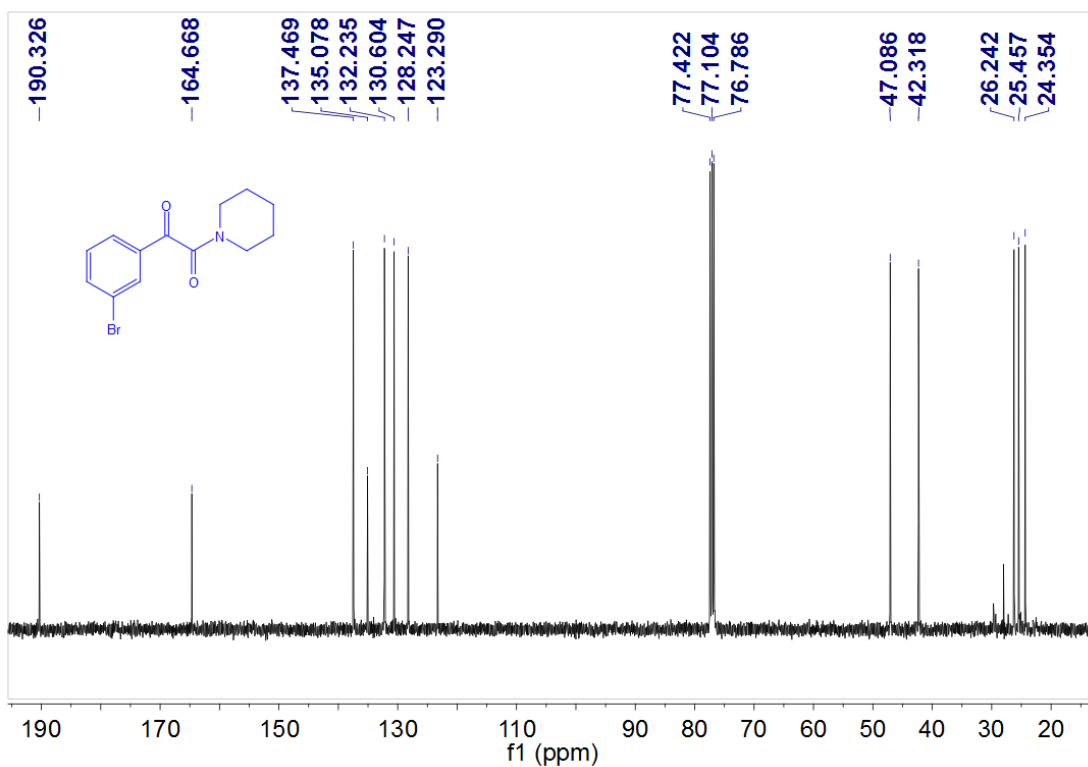

***<sup>1</sup>H NMR for 1-(Piperidin-1-yl)-2-(o-tolyl)ethane-1,2-dione (3gc)***

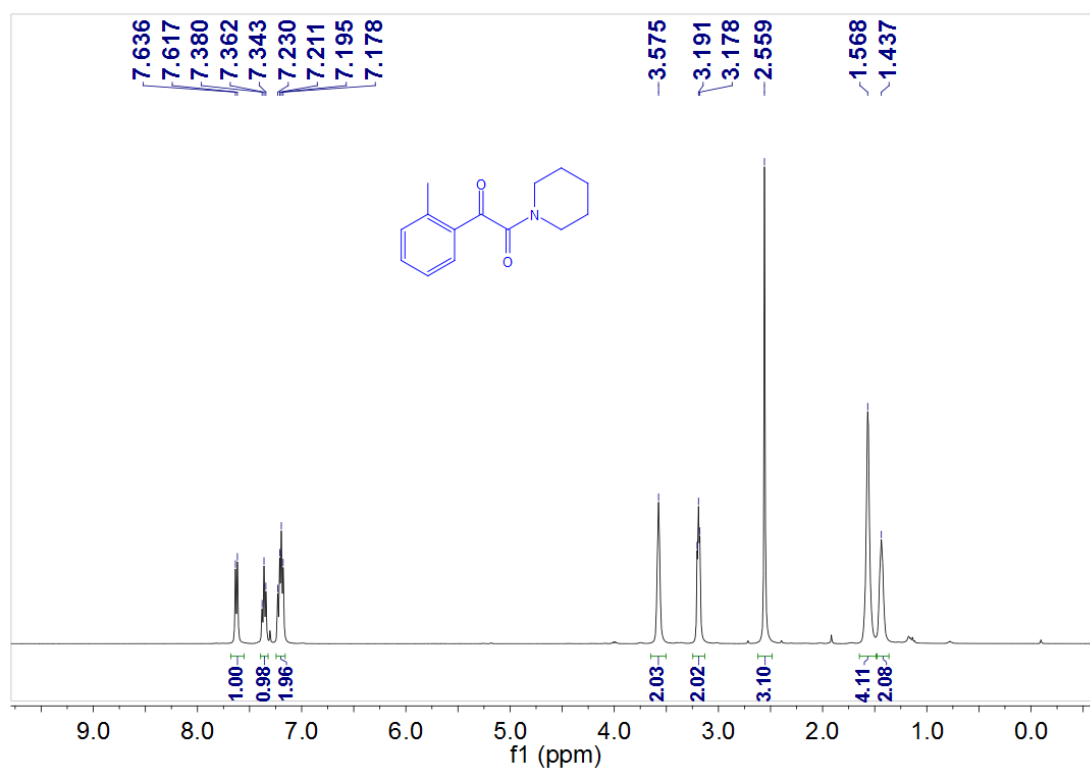

***<sup>13</sup>C NMR for 1-(Piperidin-1-yl)-2-(o-tolyl)ethane-1,2-dione (3gc)***

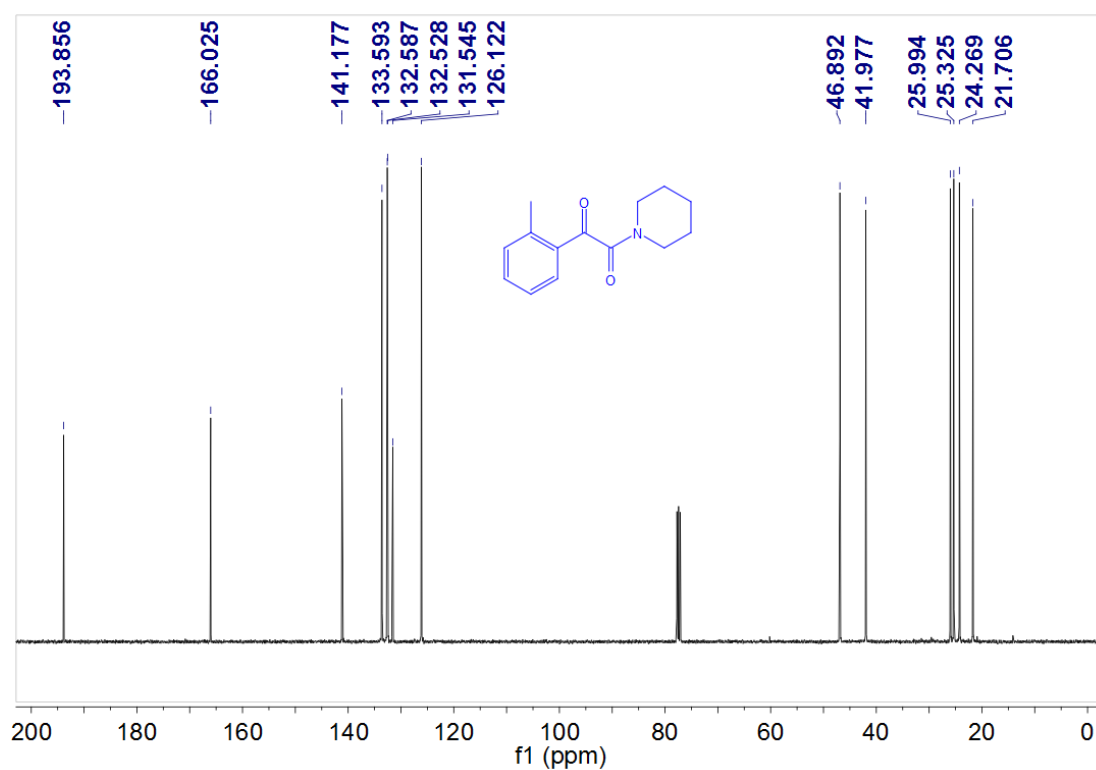



*<sup>1</sup>H NMR for 1-(piperidin-1-yl)-2-(m-tolyl)ethane-1,2-dione (3hc)*

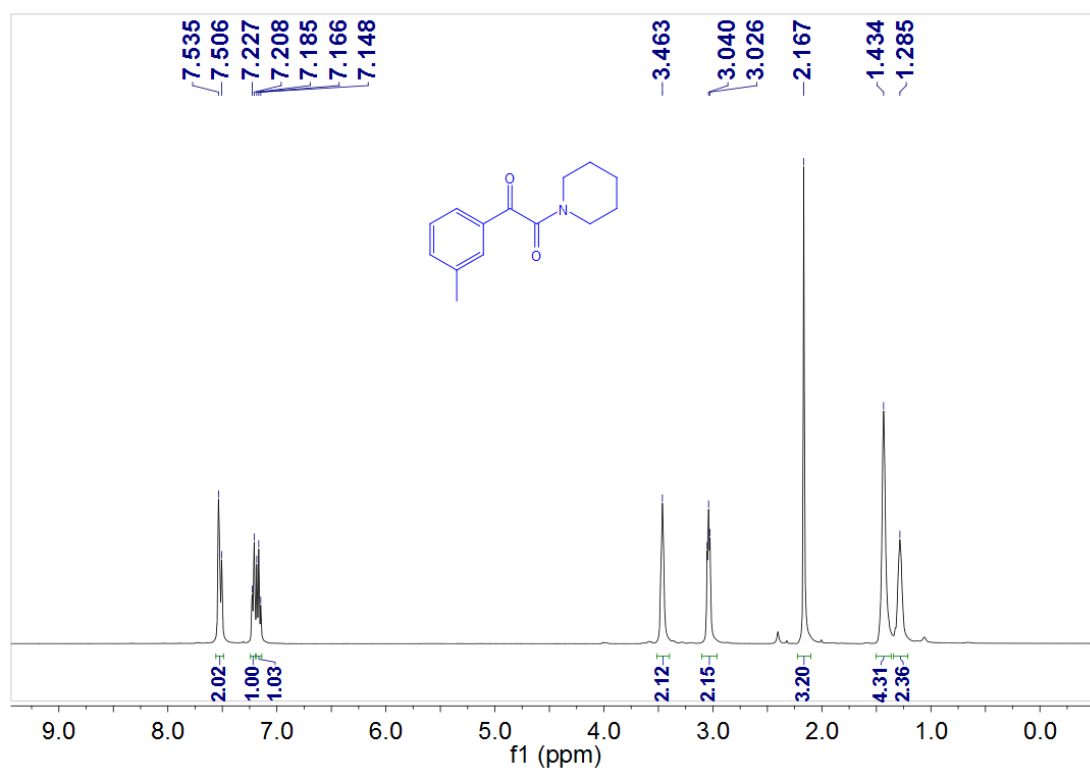

*<sup>13</sup>C NMR for 1-(piperidin-1-yl)-2-(m-tolyl)ethane-1,2-dione (3hc)*

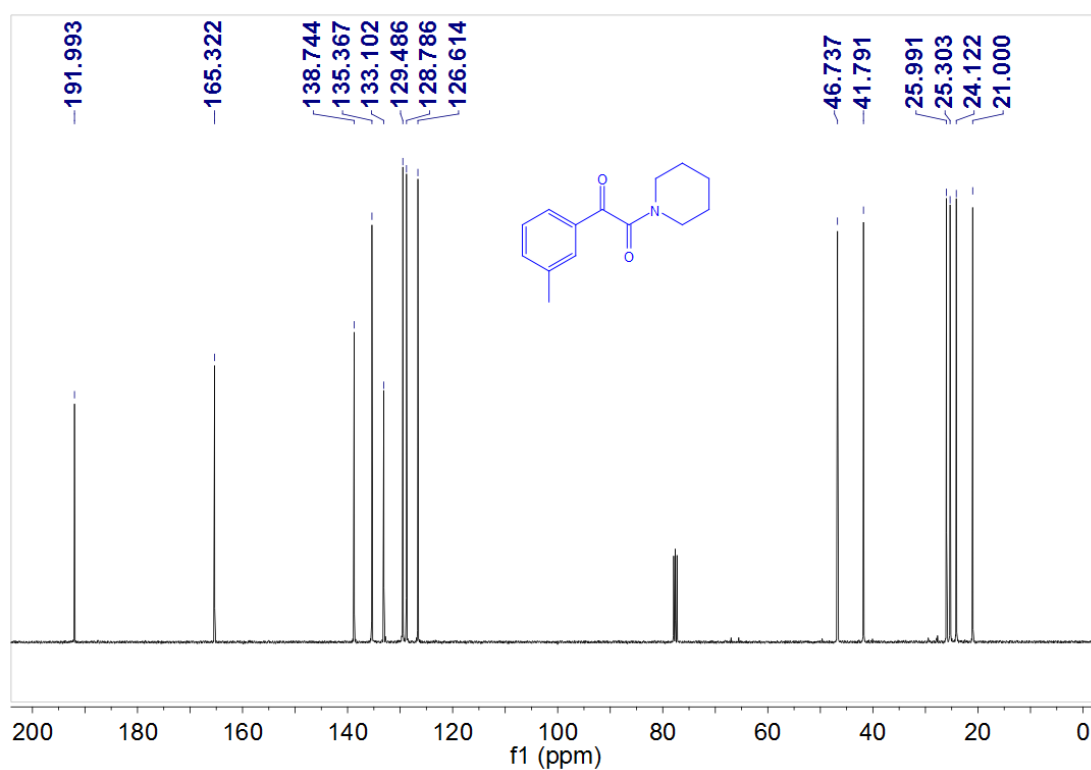

<sup>1</sup>H NMR for 1-(Piperidin-1-yl)-2-(p-tolyl)ethane-1,2-dione (3ic)

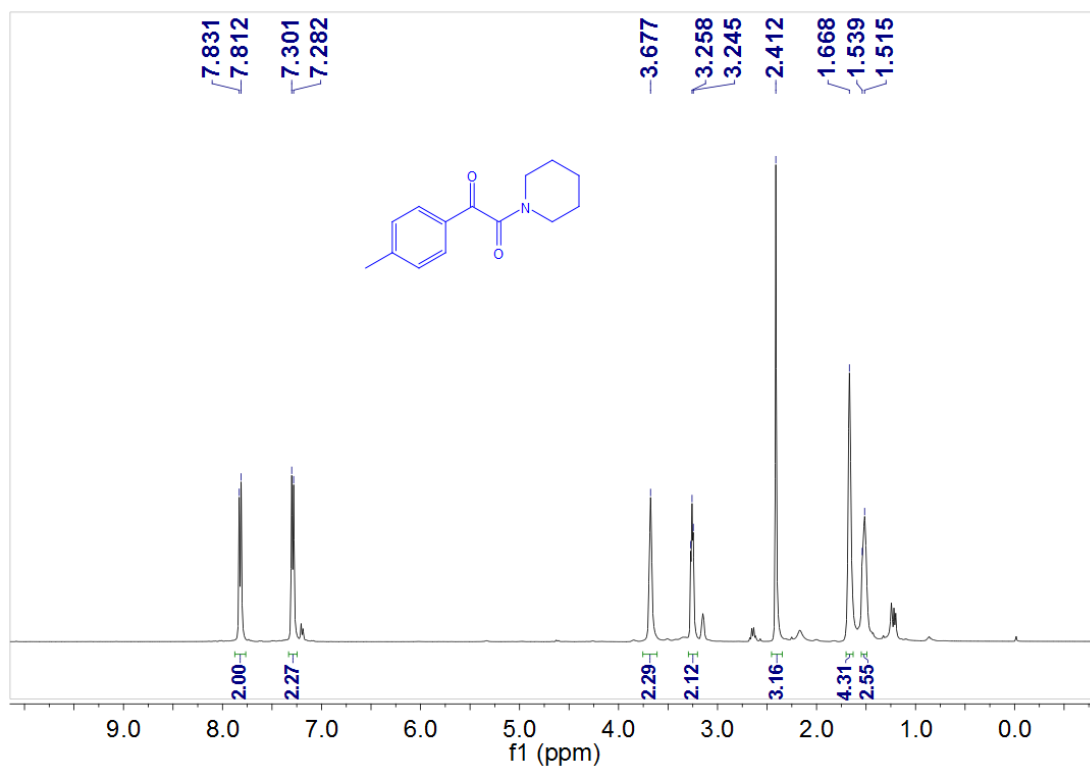

<sup>13</sup>C NMR for 1-(Piperidin-1-yl)-2-(p-tolyl)ethane-1,2-dione (3ic)

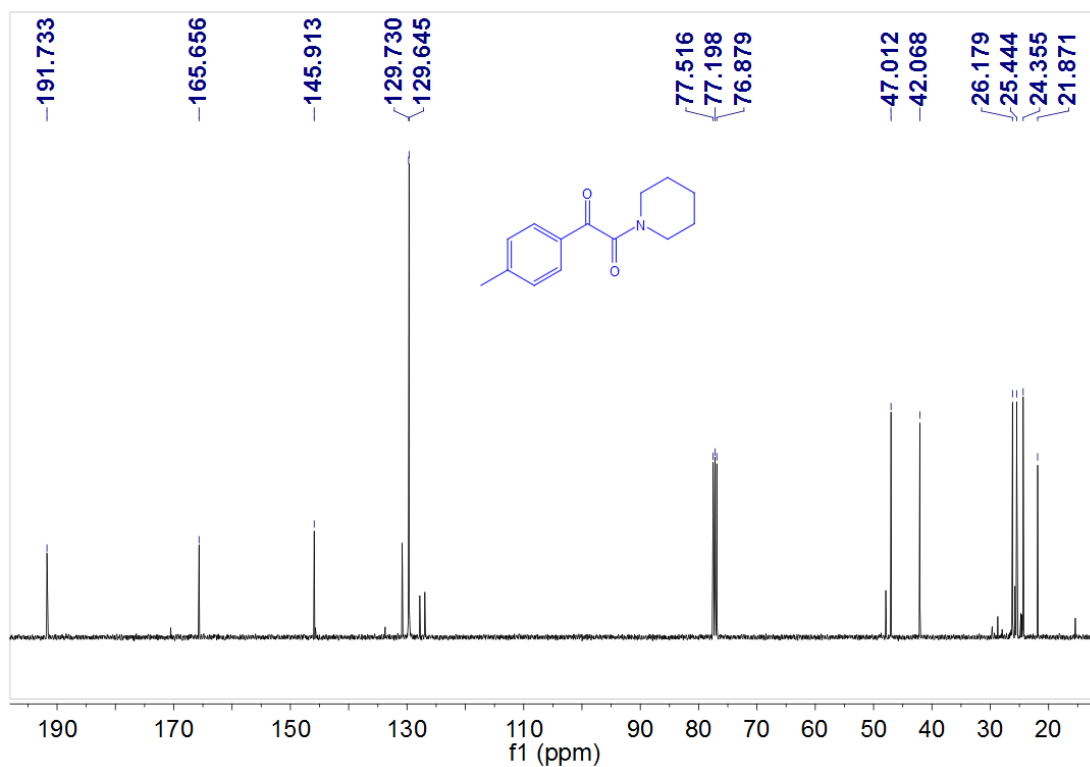

*<sup>1</sup>H NMR for 1-(4-Methylpiperidin-1-yl)-2-phenylethane-1,2-dione (3ad)*

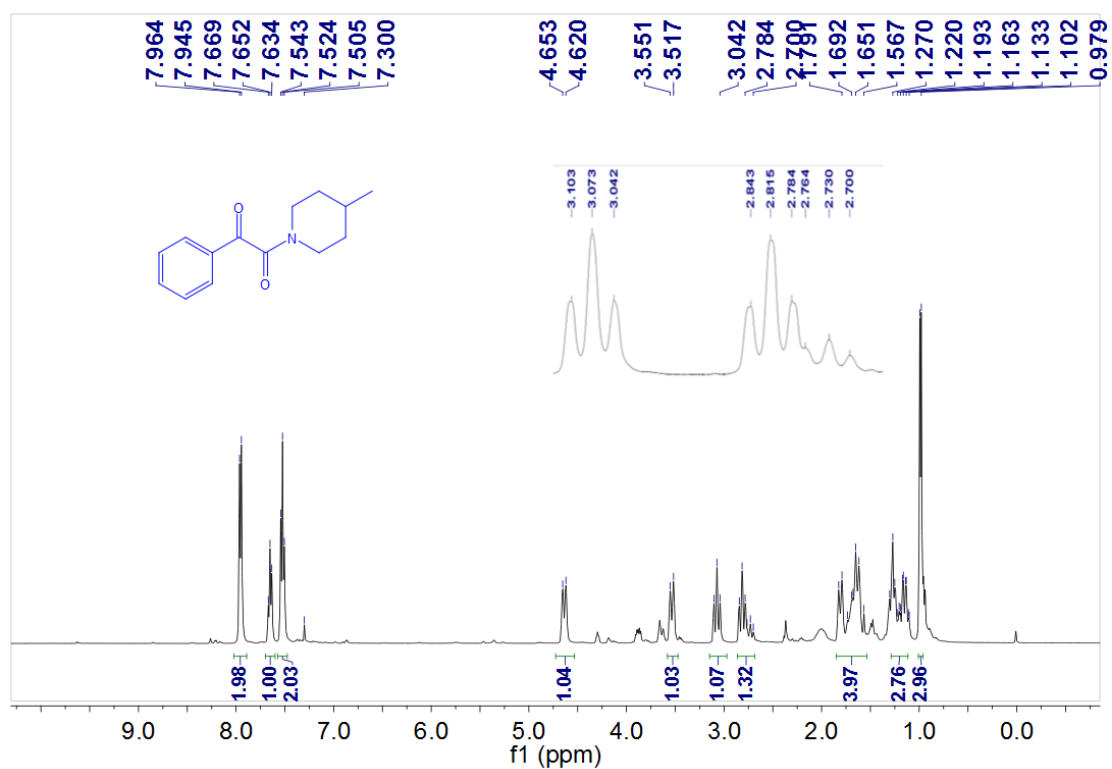

*<sup>13</sup>C NMR for 1-(4-Methylpiperidin-1-yl)-2-phenylethane-1,2-dione (3ad)*

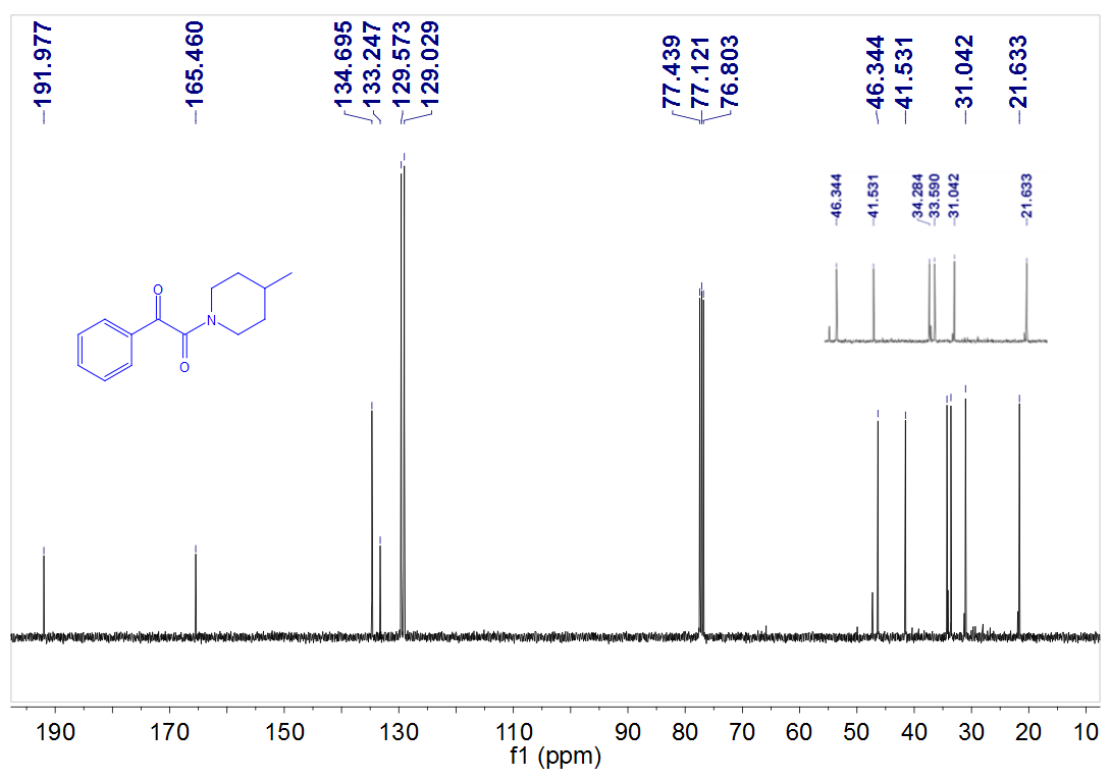

*<sup>1</sup>H NMR for tert-butyl 4-(2-oxo-2-phenylacetyl)piperazine-1-carboxylate (3ae)*

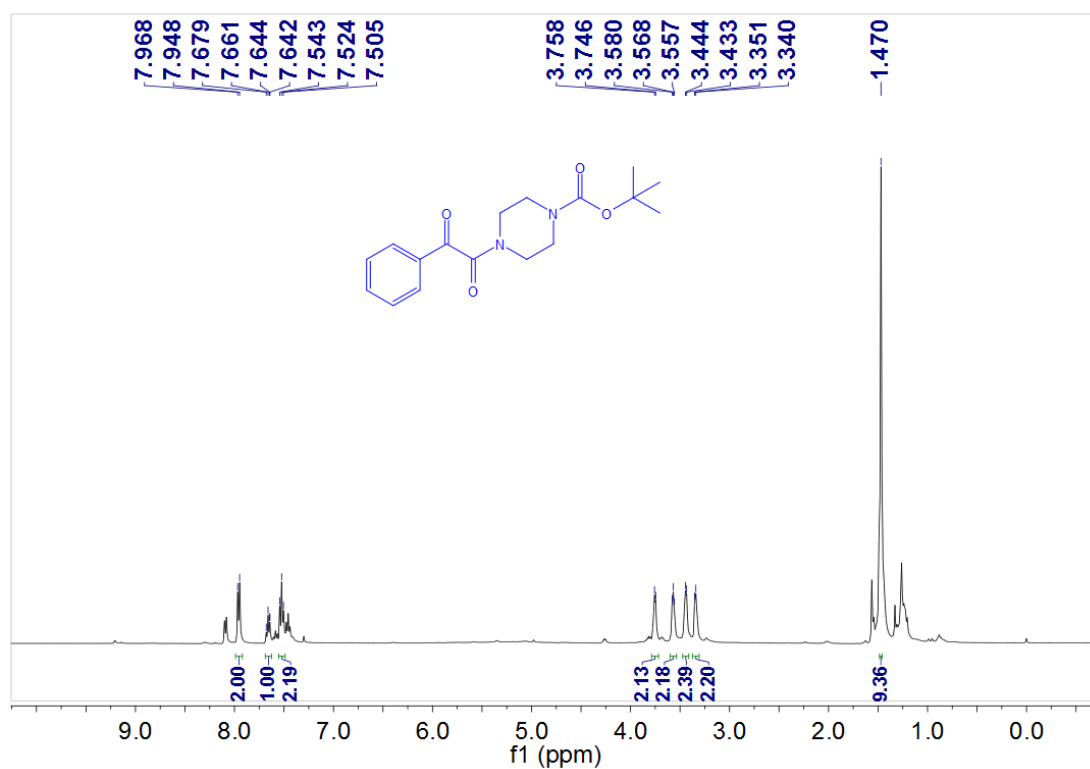

*<sup>13</sup>C NMR for tert-butyl 4-(2-oxo-2-phenylacetyl)piperazine-1-carboxylate (3ae)*

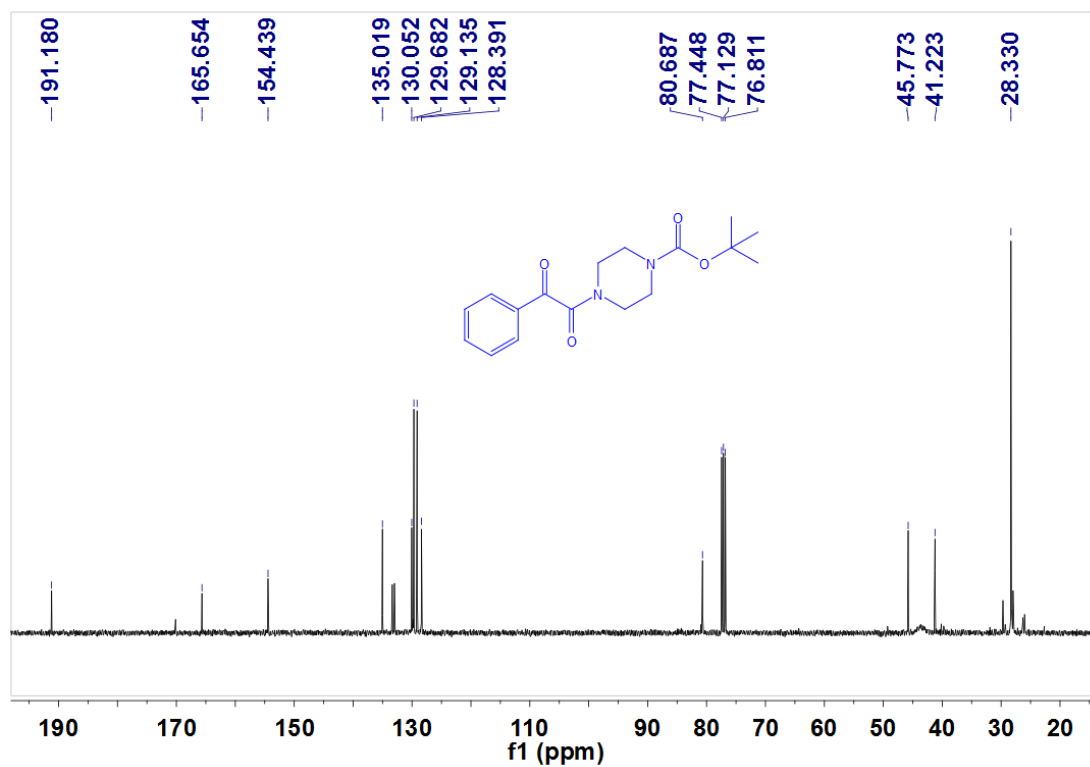

<sup>1</sup>H NMR for *N,N*-diethyl-2-oxo-2-phenylacetamide (3af)

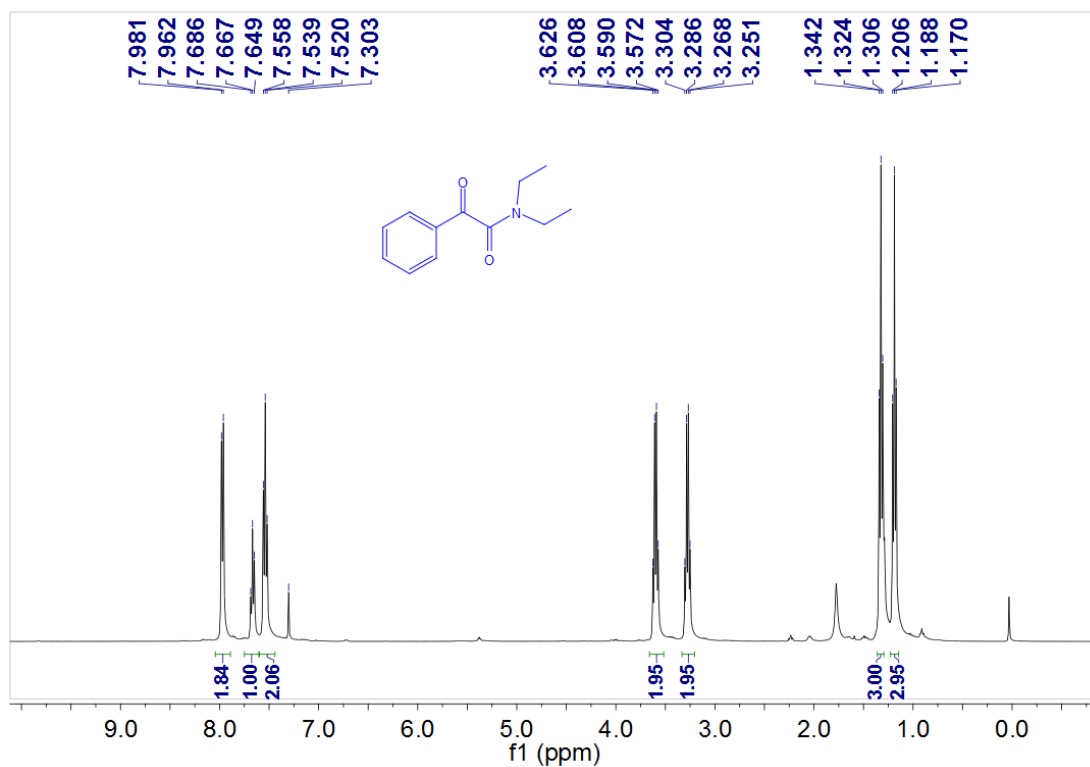

<sup>13</sup>C NMR for *N,N*-diethyl-2-oxo-2-phenylacetamide (3af)

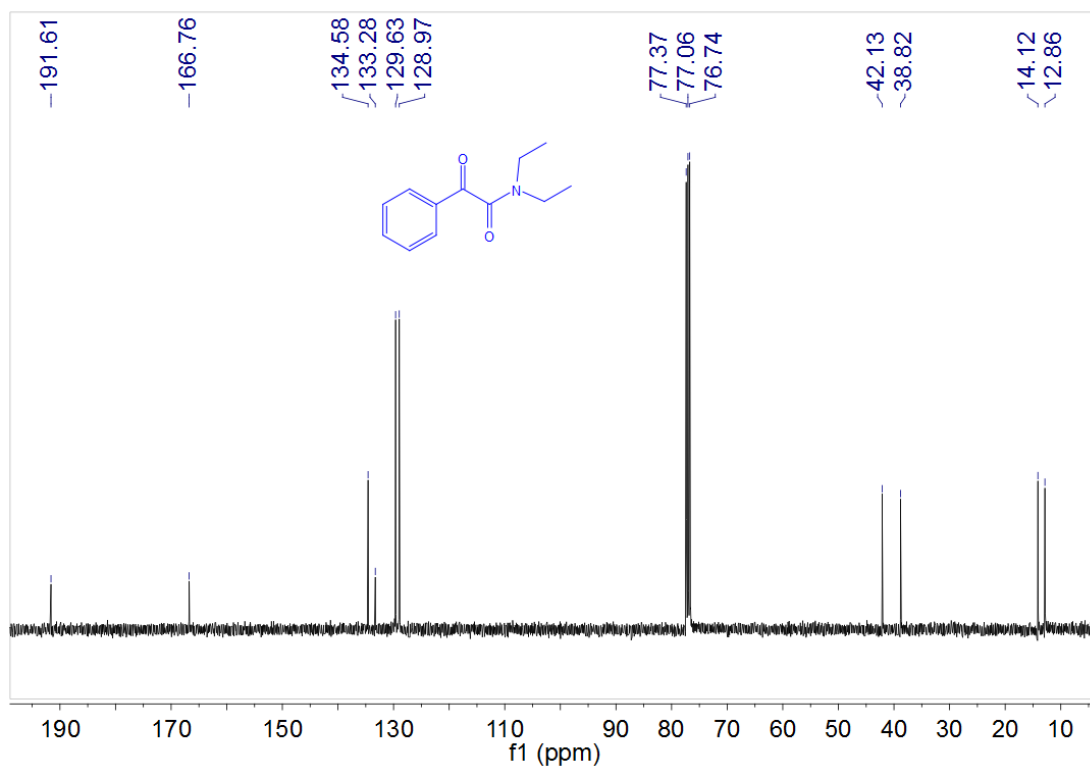

## 5. References

- [1] G. Sekar, N. Sharma, S. Kotha and N. Lahiri, *Synthesis Stuttgart*, 2015, **47**, 726.
- [2] B. N. Du, B. Jin and P. P. Sun, *Org. Biomol. Chem.*, 2014, **12**, 4586.
- [3] X. B. Zhang, M. Wang, Y. C. Zhang and L. Wang, *RSC Adv.*, 2013, **3**, 1311.
- [4] S. Dutta, S. S. Kotha and G. Sekar, *Rsc Adv.*, 2015, **5**, 47265.
- [5] N. Mupparapu, S. Khan, S. Battula, M. Kushwaha, A. P. Gupta, Q. N. Ahmed and R.A. Vishwakarma, *Org. Lett.*, 2014,**16**, 1152.
- [6] X. B. Zhang and L. Wang, *Green Chem.*, 2012, **14**, 2141.
- [7] R. Deshidi, M. Kumar, S. Devari and B. A. Shah, *Chem. Commun.*, 2014, **50**, 9533.
- [8] R. Deshidi, S. Devari and B. A. Shah, *Eur. J. Org., Chem.*, 2015, **2015**, 1428.
